# Supplementary material for: Assessing fracture risk in people with MS: a service development study comparing three fracture risk scoring systems
Source: PubMed Central journal article supplement — BMJ Open. 2013 Mar 11;3(3):e002508. doi: 10.1136/bmjopen-2012-002508 (PMC3612805; doi:10.1136/bmjopen-2012-002508), 2013-03-11
Supplement: bmjopen-2012-002508.draft_revisions.pdf [file bmjopen-2012-002508.draft_revisions.pdf]

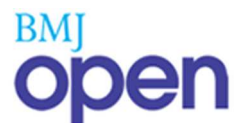

**Assessing fracture risk in people with MS: a service development study comparing three fracture risk scoring systems**

|                                 |                                                                                                                                                                                                                                                                               |
|---------------------------------|-------------------------------------------------------------------------------------------------------------------------------------------------------------------------------------------------------------------------------------------------------------------------------|
| Journal:                        | <i>BMJ Open</i>                                                                                                                                                                                                                                                               |
| Manuscript ID:                  | bmjopen-2012-002508                                                                                                                                                                                                                                                           |
| Article Type:                   | Research                                                                                                                                                                                                                                                                      |
| Date Submitted by the Author:   | 18-Dec-2012                                                                                                                                                                                                                                                                   |
| Complete List of Authors:       | Dobson, Ruth; Queen Mary University London, Blizard Institute<br>Leddy, Sara; Queen Mary University London, Blizard Institute<br>Gangadharan, Sunay; Queen Mary University London, Blizard Institute<br>Giovannoni, Gavin; Queen Mary University of London, Blizard Institute |
| <b>Primary Subject Heading</b>: | Neurology                                                                                                                                                                                                                                                                     |
| Secondary Subject Heading:      | Evidence based practice                                                                                                                                                                                                                                                       |
| Keywords:                       | Multiple sclerosis < NEUROLOGY, Osteoporosis, Fracture                                                                                                                                                                                                                        |
|                                 |                                                                                                                                                                                                                                                                               |

SCHOLARONE™  
Manuscripts

1  
2  
3 **Assessing fracture risk in people with MS: a service development study comparing three fracture**  
4 **risk scoring systems**  
5

6 R Dobson MA MRCP, SG Leddy BSc, S Gangadharan, G Giovannoni PhD, FRCP  
7

8 R Dobson: Clinical Research Fellow and Honorary SpR Neurology  
9

10 SG Leddy and S Gangadharan: Medical Students  
11

12 G Giovannoni: Professor of Neurology  
13

14 Address for all authors: Blizard Institute, Queen Mary University of London, Barts and the London  
15

16 School of Medicine and Dentistry, London, UK  
17  
18  
19  
20  
21

22 Corresponding author: Dr Ruth Dobson; Blizard Institute, 4 Newark Street, London, E1 2AT.  
23

24 Telephone 0207 882 2282 email [ruth.dobson@qmul.ac.uk](mailto:ruth.dobson@qmul.ac.uk)  
25  
26

27 Guarantor: Professor G Giovannoni; Blizard Institute, 4 Newark Street, London, E1 2AT. Email  
28

29 [g.giovannoni@qmul.ac.uk](mailto:g.giovannoni@qmul.ac.uk)  
30  
31  
32  
33  
34

35 **Research Article**

36 **Keywords:** Multiple Sclerosis, osteoporosis, fracture.  
37

38 **Abstract:** 151 words  
39

40 **Paper:** 1892 words  
41

42 **15 references**  
43

44 **3 figures and 3 tables**  
45

46 **Running head:** Assessing fracture risk in MS  
47  
48  
49  
50  
51  
52  
53  
54  
55  
56  
57  
58  
59  
60

**Abstract**

**Objectives:** Suboptimal bone health is increasingly recognised as an important cause of morbidity. Multiple sclerosis (MS) has been consistently associated with an increased risk of osteoporosis and fracture. Various fracture risk screening tools have been developed, two of which are in routine use, and a further one is MS-specific. We set out to compare the results obtained by these in the MS clinic population.

**Design:** This was a service development study. The 10-year risk estimates of any fracture and hip fracture generated by each of the algorithms were compared.

**Setting and participants:** 88 patients with a confirmed diagnosis of MS who were attending the MS clinic at the Royal London Hospital were assessed.

**Outcome measures:** Mean 10-year overall fracture risk and hip fracture risk were calculated using each of the three fracture risk calculators. The number of interventions that would be required as a result of using each of these tools were also compared.

**Results:** Mean 10-year fracture risk was 4.7%, 2.3% and 7.6% using FRAX, QFracture and the MS-specific calculator respectively ( $p < 0.0001$  for difference). The agreement between risk scoring tools was poor at all levels of fracture risk.

**Conclusions:** The agreement between these three fracture risk scoring tools is poor in the MS population. Further work is required to develop and validate an accurate fracture risk scoring system for use in MS.

**Trial registration:** This service development study was approved by the Clinical Effectiveness Department at Barts Health NHS Trust (project registration number 156/12).

## Article summary

### Article focus:

- Recent National Institute of Clinical Excellence (NICE) guidelines in the UK recommend assessing bone health using one of two validated scoring systems, FRAX and QFracture in those at risk of fragility fracture. However, these fracture risk scoring systems do not take into account all risks associated with fragility fractures.
- Multiple sclerosis (MS) has been associated with an increased hazard ratio of hip fracture, and was one of the two neurological conditions significantly associated with an increased risk of fracture in the Global Longitudinal study of Osteoporosis in Women (GLOW) study.
- This study therefore set out to compare existing fracture risk scoring algorithms in a multiple sclerosis clinic, in order to assess both the effect of using each of the algorithms on further investigations and treatment, and to assess whether the algorithms provide similar results in this clinic population.

### Key messages:

- The agreement between fracture risk calculators is poor, with QFracture consistently giving lower risk estimates than FRAX.
- Whilst reducing fracture risk should be a priority to all clinicians dealing with chronic conditions associated with an increased risk of fracture, there must be consistency in the way in which fracture risk is calculated. A prospective study is urgently required in order that we can determine the best way to prevent fractures.

### Strengths and limitations:

- To the best of our knowledge, this is the first study to directly compare fracture risk scoring tools in this clinic population, assessing the rate of interventions that would be indicated by using each tool

- However, the lack of longitudinal follow up does not allow us to fully assess the relative accuracy of each tool. Further longitudinal prospective studies are required.

For peer review only

## Introduction

Suboptimal bone health is increasingly recognised as an important cause of morbidity. Recent National Institute of Clinical Excellence (NICE) guidelines in the UK (1) recommend assessing bone health using one of two validated scoring systems, FRAX and QFracture in those at risk of fragility fracture (2, 3). These scores, both of which have been generated from and validated against large databases, allow the calculation an individuals' 10-year fracture risk, both in terms of any fracture and hip fracture. NICE guidelines currently recommend the calculation of fracture risk before proceeding to DXA imaging (1).

However, these fracture risk scoring systems do not take into account all risks associated with fragility fractures. Multiple sclerosis (MS) has been associated with a hazard ratio of hip fracture of 1.9 – 4.08 (4), and was one of the two neurological conditions significantly associated with an increased risk of fracture in the Global Longitudinal study of Osteoporosis in Women (GLOW) study (HR of fracture in MS 1.7; 95%CI 1.2-2.6) (5). There have been recent efforts to develop a fracture risk calculator that takes into account the increased risk of fracture and osteoporosis associated with MS (6). However, this calculator has been developed from a single database, the UK General Practice Database, and has not been validated to date.

There are common factors associated with an increased risk of developing MS and an increased fracture risk, such as vitamin D deficiency and smoking. It therefore seems likely that the increased fracture risk associated with MS develops early in the disease (4). Indeed, it has been shown that the lowered bone mineral density associated with MS develops whilst patients remain fully mobile (4). This leads to problems using fracture risk assessment tools, as the FRAX algorithm has the lowest age set at 40 years, whilst in the QFracture algorithm the lowest age is 30. The mean age of MS diagnosis is approximately 29 (7), implying that many patients are first seen at a relatively young age.

1  
2  
3 It has been argued that the 10-year fracture risk at which intervention becomes cost-effective varies  
4 according to the country in which the societal cost is modelled (8). For a 50-year-old individual, the  
5 10-year fracture risk at which it becomes cost-effective to intervene may be as low as 0.84% in the  
6 UK (a relative risk of osteoporotic fracture of 1.83 compared to the general population, similar to  
7 that associated with MS; in the USA treatment at a relative risk of 1.31 is thought to be cost-  
8 effective) (8). This highlights the importance of fracture risk screening in the MS clinic population.  
9

10  
11  
12 Given the importance of fracture risk screening in the MS population and the uncertainty regarding  
13 which risk calculator to use we set out to compare the three fracture risk calculator systems in the  
14 MS outpatient clinic population. This study enables direct comparison of the fracture risk estimates  
15 generated by these three studies in addition to examining the number of interventions that the use  
16 of each of these calculators would result in.  
17  
18  
19  
20  
21  
22  
23  
24  
25  
26  
27

## 28 **Methods**

### 29 *Patient selection and data collection*

30  
31  
32 This service development study was approved by the Clinical Effectiveness Department at Barts  
33 Health NHS Trust (project registration number 156/12). 100 patients with clinically definite MS  
34 attending either the MS outpatient clinic or the Neurology Daycase Unit were assessed. Sufficient  
35 data to enable fracture risk scoring was available on 88 patients (see **table 1** for details of data  
36 required for each fracture risk calculator). The use of an assistive device for walking was also  
37 recorded.  
38  
39  
40  
41  
42  
43  
44  
45  
46  
47

48 Details regarding previous DXA imaging, previous fragility or other fracture, and medications used  
49 for the treatment of reduced bone mineral density were recorded.  
50  
51

### 52 *Fracture risk scoring*

1  
2  
3 10 year risk of both “any fracture” and “hip fracture” was assessed using the FRAX scoring algorithm  
4  
5 (2), the QFracture algorithm (3) and the recently proposed MS-specific fracture risk score algorithm  
6  
7 (6). As the FRAX score algorithm only allows a minimum age of 40 years, patients aged <40 were  
8  
9 assigned an age of 40 for the purposes of this calculation. The QFracture algorithm allows a  
10  
11 minimum age of 30 and a similar assumption was made. The MS-specific fracture risk calculator does  
12  
13 not have a lower age cut-off.  
14  
15

16  
17 In order to assess the number of patients who would require DXA imaging and/or treatment, an  
18  
19 imaging threshold of a 10-year fracture risk for any fracture of >5% was assigned. The treatment  
20  
21 threshold was taken to be a 10-year fracture risk of >7% for any fracture, and >4% for hip fracture.  
22  
23 The UK National Osteoporosis Guideline Group (NOGG) has estimated that in the UK pharmacologic  
24  
25 treatment is cost effective at all ages when the 10-year probability of major osteoporotic fracture  
26  
27 exceeds 7% (9). In practice, the UK NOGG recommends an age-dependent intervention threshold,  
28  
29 which ranges from 1 10-year fracture risk of 7.5 – 30% for ages 50 to 80 years (10). However, these  
30  
31 figures are, if anything, somewhat conservative as discussed above.  
32  
33

#### 34 35 *Statistical analysis*

36  
37 Statistical analysis was performed using PASW v18.0 (SPSS). Risk score distributions were assessed  
38  
39 for normality using a Shapiro-Wilk test, and attempts made to normalise the data using a natural log  
40  
41 transformation. As it proved impossible to normalise the data, non-parametric statistical tests were  
42  
43 used. The absolute risk scores generated by each fracture risk score were directly compared using  
44  
45 the Friedman test. Scores were then compared between pairs of risk scoring systems using the  
46  
47 Wilcoxon signed rank test.  
48  
49

50  
51 The agreement between individual scores was assessed using a Bland-Altman plot (11). This method  
52  
53 allows a visual description of both the agreement between ELISAs, in addition to demonstrating any  
54  
55 systematic or significant proportional errors between the two sets of results (11). Additionally, the  
56  
57  
58  
59  
60



1  
2  
3 proportion of individuals meeting the pre-set criteria for DXA imaging and potential treatment  
4  
5 intervention was compared using Fishers exact test.  
6  
7

## 8 **Results**

### 9 *Subjects*

10  
11  
12  
13  
14 Of 100 patients recruited, 88 gave sufficient information to allow their 10-year fracture risk to be  
15 accurately calculated using the three algorithms. Demographic details are given in **table 2**. 42/100  
16 patients used a walking aid; of whom 8 required bilateral assistance and 3 used a wheelchair to  
17 mobilise. 49/100 patients reported falling in the preceding 6 months. 22 (52%) patients using a  
18 walking aid reported falls in the preceding 6 months compared to 28% of those who did not require  
19 a walking aid. No patients had a history of a prior fracture meeting the definition of a fragility  
20 fracture (12).  
21  
22  
23  
24  
25  
26  
27  
28  
29

### 30 *Fracture risk*

#### 31 32 33 *a. 10 year risk of any fracture*

34  
35  
36 Mean 10-year fracture risk was 4.7% assessed by FRAX (standard deviation; SD 3.20, range 2.3-19.0),  
37 2.3% assessed by QFracture (SD 2.14, range 0.4-13.0) and 7.6% using the MS-specific calculator (SD  
38 5.05, range 2.0-25.0) (**table 3**). Despite efforts it was not possible to normalise the distribution for  
39 any of the fracture risk scores. There was an overall significant difference between the scores  
40 generated by the three algorithms ( $p < 0.001$ ; Friedman test), which was preserved on pairwise  
41 testing ( $p < 0.001$  for all comparisons, Wilcoxon signed rank test) (**table 3 and figure 1**).  
42  
43  
44  
45  
46  
47  
48

49  
50 Bland-Altman plots revealed reasonable agreement between FRAX and QFracture at lower fracture  
51 risk scores, but for those patients with higher fracture risk a systematic error was apparent with  
52 QFracture consistently giving lower risk estimates than FRAX (mean difference 2.68) (**figure 2**). When  
53 FRAX and the MS-specific risk score were compared the agreement was poor, with FRAX consistently  
54  
55  
56  
57  
58  
59  
60

1  
2  
3 lower than the MS-specific score (mean difference 2.97) (**figure 3**). The same could be seen when  
4  
5 QFracture and the MS-specific risk score were compared (mean difference 5.60; data not shown).  
6  
7

8 The number of patients who met the pre-determined criteria for DXA imaging and treatment are  
9  
10 given in **table 4**. There was a significant difference between all three groups for both DXA imaging  
11  
12 ( $p < 0.0001$  for all comparisons) and treatment ( $p = 0.03$  when comparing FRAX and QFracture,  
13  
14 otherwise  $p < 0.0001$ ). Of the six patients who had previously undergone DXA imaging, 3 met the  
15  
16 criteria for imaging using either the FRAX or MS-specific risk score. None met the fracture risk cut-off  
17  
18 for imaging using the QFracture algorithm. Of the six patients who had undergone DXA imaging, four  
19  
20 were on no treatment, one patient was taking calcium supplementation and one HRT. None of the  
21  
22 patients had been diagnosed with osteoporosis.  
23  
24

25  
26 *b. 10 year risk of hip fracture*  
27  
28

29 Mean 10-year hip fracture risk was 0.7% assessed by FRAX (standard deviation; SD 0.95, range 0.1-  
30  
31 5.6), 0.2% assessed by QFracture (SD 0.55, range 0.0-4.8) and 3.4% using the MS-specific calculator  
32  
33 (SD 7.78, range 0.0-55.0) (**table 3**). Again, it was not possible to normalise the distribution for any of  
34  
35 the fracture risk scores. There was an overall significant difference between the scores generated by  
36  
37 the three algorithms ( $p < 0.001$ ; Friedman test), which was preserved on pairwise testing ( $p = 0.004$  for  
38  
39 comparison of FRAX and MS-specific risk calculator,  $p < 0.001$  for other comparisons, Wilcoxon signed  
40  
41 rank test) (**table 3 and figure 4**).  
42  
43  
44

45 The comparison of scores generated similar Bland-Altman plots to those seen when examining the  
46  
47 data for overall fracture risk (data not shown). There was no difference between FRAX and  
48  
49 QFracture in the number of patients who met the predetermined treatment threshold, however  
50  
51 both differed significantly from the MS-specific fracture risk calculator ( $p < 0.0001$  for both  
52  
53 comparisons).  
54  
55

56 **Discussion**  
57  
58  
59  
60

1  
2  
3 It can therefore be seen that the agreement between the three fracture risk calculators is poor. One  
4  
5 failure of the FRAX algorithm is that it does not allow the calculation of accurate risk for those aged  
6  
7 <40, and as the majority of our patients were aged between 20 and 40, this represents a significant  
8  
9 source of error. The FRAX algorithm has previously been criticised for not incorporating factors such  
10  
11 as falls (13), and whilst this is a significant omission, it would be expected that this would lead to an  
12  
13 underestimation of risk when using this calculator.  
14

15  
16 However, the QFracture algorithm, which does incorporate falls into the calculation, gave  
17  
18 consistently lower fracture risk scores than the FRAX calculator. This may be due to a more accurate  
19  
20 estimate of age-specific risk, as the QFracture allows the imputation of age from age 30. However,  
21  
22 despite including Parkinson's disease as a factor, the QFracture calculator does not include MS.  
23  
24

25  
26 The MS-specific calculator appeared to consistently over-estimate fracture risk. Whilst one might  
27  
28 imagine that this would be the most accurate of the risk calculators, the number of patients judged  
29  
30 to be over either the investigation or treatment threshold was far higher than expected. This risk  
31  
32 calculator was generated from the UK General Practice database. It incorporates a number of factors  
33  
34 into the risk calculator that are not captured by other risk calculators, such as recent steroid use (as  
35  
36 a surrogate for relapses) and fatigue (hip fracture risk calculation only). However, it has previously  
37  
38 been shown that coding is of variable accuracy in this database (14). As most short courses of  
39  
40 intravenous steroid are given in secondary care, it is not inconceivable that these would not be  
41  
42 captured accurately. Additionally, whilst more than half of patients with MS report fatigue when  
43  
44 directly questioned (15), it is likely that only those with the very highest levels of fatigue have this  
45  
46 recorded by their General Practitioners.  
47  
48

49  
50 There remains much work to be done with regard to assessing fracture risk in this population, who  
51  
52 are at high risk of fracture and associated complications. Whilst reducing fracture risk should be a  
53  
54 priority to all clinicians dealing with chronic conditions associated with an increased risk of fracture,  
55  
56 there must be consistency in the way in which fracture risk is calculated. A prospective study in the  
57  
58  
59  
60

1  
2  
3  
4  
5  
6  
7  
8  
9  
10  
11  
12  
13  
14  
15  
16  
17  
18  
19  
20  
21  
22  
23  
24  
25  
26  
27  
28  
29  
30  
31  
32  
33  
34  
35  
36  
37  
38  
39  
40  
41  
42  
43  
44  
45  
46  
47  
48  
49  
50  
51  
52  
53  
54  
55  
56  
57  
58  
59  
60

MS population, encompassing both fracture risk calculation and bone densitometry estimation using  
DXA is urgently needed in order that we can determine the best way to prevent fractures.

For peer review only

### Contributorship

RD and GG conceived the idea of this study. RD, SGL and SG performed fracture risk scoring. RD performed the statistical analysis and initially drafted the paper. All authors provided input into the final manuscript.

The Corresponding Author has the right to grant on behalf of all authors and does grant on behalf of all authors, an exclusive licence (or non exclusive for government employees) on a worldwide basis to the BMJ Publishing Group Ltd to permit this article (if accepted) to be published in BMJ editions and any other BMJ PGL products and sublicences such use and exploit all subsidiary rights, as set out in our licence."

### Ethical approval

This service development study was approved by the Clinical Effectiveness Department at Barts Health NHS Trust (project registration number 156/12).

### Conflicts of interest

RD, SGL and SG have no conflicts of interest to declare.

GG has received research grant support from Bayer-Schering Healthcare, Biogen-Idec, GW Pharma, Merck Serono, Merz, Novartis, Teva and Sanofi-Aventis. GG has received personal compensation for participating on Advisory Boards in relation to clinical trial design, trial steering committees and data and safety monitoring committees from: Bayer-Schering Healthcare, Biogen-Idec, Eisai, Elan, Fiveprime, Genzyme, Genentech, GSK, Ironwood, Merck-Serono, Novartis, Pfizer, Roche, Sanofi-Aventis, Synthon BV, Teva, UCB Pharma and Vertex Pharmaceuticals.

### Funding

RD is funded by an Association of British Neurologists/MS Society of Great Britain Clinical Research Fellowship.

1  
2  
3  
4  
5  
6  
7  
8  
9  
10  
11  
12  
13  
14  
15  
16  
17  
18  
19  
20  
21  
22  
23  
24  
25  
26  
27  
28  
29  
30  
31  
32  
33  
34  
35  
36  
37  
38  
39  
40  
41  
42  
43  
44  
45  
46  
47  
48  
49  
50  
51  
52  
53  
54  
55  
56  
57  
58  
59  
60

GG receives grant support from the MRC, National MS Society, MS Society of Great Britain and Northern Ireland, AIMS2CURE and the Roan Charitable Trust.

For peer review only

**Figure legends**

**Table 1:** Data used in the calculation of fracture risk for each of the three risk scoring algorithms used

**Table 2:** Patient details

**Table 3:** 10 year any fracture risks generated by each of the three fracture risk scoring algorithms

**Figure 1:** Combined scatter and box-and-whisker plot demonstrating 10-year any fracture risk generated by each of the three risk scoring algorithms. The box represents the 25<sup>th</sup>-75<sup>th</sup> centile bisected by the median, with the whiskers the range.

**Figure 2:** (a) Bland-Altman plot comparing FRAX and QFracture scores for 10-year risk of any fracture. (b) Bland-Altman plot comparing FRAX and MS-specific scores for 10-year risk of any fracture

**Figure 3:** 10-year hip fracture risks generated by each of the three risk scoring algorithms

**Table 1:** Data used in the calculation of fracture risk for each of the three risk scoring algorithms

| FRAX                            | QFracture                                                | MS-specific calculator                                                |
|---------------------------------|----------------------------------------------------------|-----------------------------------------------------------------------|
| Age                             | Age                                                      | Age                                                                   |
| Sex                             | Sex                                                      | Sex                                                                   |
| Weight; height; BMI             | Weight; height; BMI                                      | BMI                                                                   |
| Previous fracture               | Previous fragility fracture                              | Previous fracture (any fracture only)                                 |
| Parental hip fracture           | Parental osteoporosis or hip fracture                    |                                                                       |
| Current smoking                 | Current or previous smoking, number of cigarettes smoked | Current smoking                                                       |
| Glucocorticoid exposure         | Regular glucocorticoid exposure                          | Use of PO/IV glucocorticoids in the prior 6 months                    |
| Rheumatoid arthritis            | Rheumatoid arthritis or SLE                              |                                                                       |
| Secondary osteoporosis          |                                                          |                                                                       |
| Alcohol >3 units/day            | Alcohol number of units/day                              |                                                                       |
| Femoral neck DXA (if available) |                                                          |                                                                       |
|                                 | Ethnicity                                                |                                                                       |
|                                 | Diabetes                                                 |                                                                       |
|                                 | Nursing/care home residence                              |                                                                       |
|                                 | Falls                                                    | History of falling 3 months – 1 year before                           |
|                                 | Dementia                                                 |                                                                       |
|                                 | Cancer                                                   |                                                                       |
|                                 | Asthma/COPD                                              |                                                                       |
|                                 | Heart attack, angina, stroke, TIA                        |                                                                       |
|                                 | Chronic liver disease                                    |                                                                       |
|                                 | Chronic kidney disease                                   |                                                                       |
|                                 | Parkinson's disease                                      |                                                                       |
|                                 | Malabsorption including Crohn's disease                  |                                                                       |
|                                 | Endocrine problems including thyroid dysfunction         |                                                                       |
|                                 | Epilepsy/anticonvulsant exposure                         | Use of anticonvulsants in the prior 6 months (any fracture risk only) |
|                                 | Antidepressants                                          | Use of antidepressants in the prior 6 months                          |
|                                 | Oestrogen-only HRT                                       |                                                                       |
|                                 |                                                          | History of fatigue in the prior 6 months (hip fracture only)          |

**BMI:** body mass index

**Glucocorticoid exposure:** defined as currently exposure to oral glucocorticoids or previous exposure to oral glucocorticoids for more than 3 months at a dose of prednisolone of 5mg daily or more (or equivalent doses of other glucocorticoids).



**Secondary osteoporosis:** defined as a disorder strongly associated with osteoporosis. These include type I (insulin dependent) diabetes, osteogenesis imperfecta in adults, untreated long-standing hyperthyroidism, hypogonadism or premature menopause (<45 years), chronic malnutrition, or malabsorption and chronic liver disease.

**PO:** oral

**IV:** intravenous

**Table 2:** Patient details

| Characteristic              | Patients (n=88)    |
|-----------------------------|--------------------|
| Age (mean; range)           | 37.5 years (22-56) |
| Female (n;%)                | 55 (62.5%)         |
| BMI (mean; range)           | 24.4 (15.5-46.1)   |
| BMI <20 (n;%)               | 15 (17%)           |
| Current smoking (n;%)       | 28 (31.8%)         |
| History of falls (n;%)      | 38 (43.2%)         |
| Previous fragility fracture | 0 (0%)             |
| Previous DXA imaging        | 6 (6.8%)           |

**Table 3:** 10 year fracture risks generated

|                                                                      | FRAX<br>Any<br>fracture (10<br>year % risk) | QFracture<br>Any<br>fracture (10<br>year % risk) | MS-Specific<br>Any<br>osteoporotic<br>fracture (10<br>year % risk) | FRAX<br>Hip<br>fracture (10<br>year % risk) | QFracture<br>Hip fracture<br>(10 year %<br>risk) | MS-Specific<br>Hip<br>fracture (10<br>year % risk) |
|----------------------------------------------------------------------|---------------------------------------------|--------------------------------------------------|--------------------------------------------------------------------|---------------------------------------------|--------------------------------------------------|----------------------------------------------------|
| <b>Mean (SD)</b>                                                     | 4.69 (3.20)                                 | 2.04 (2.14)                                      | 7.64 (5.05)                                                        | 0.66 (0.95)                                 | 0.23 (0.55)                                      | 3.39 (7.78)                                        |
| <b>Median</b>                                                        | 3.45                                        | 1.20                                             | 6.00                                                               | 0.30                                        | 1.20                                             | 0                                                  |
| <b>Range</b>                                                         | 2.3-19.0                                    | 0.4-13.0                                         | 2.0-25.0                                                           | 0.10-5.60                                   | 0-4.80                                           | 0-55.00                                            |
| <b>Patients<br/>meeting<br/>criteria for<br/>DXA (n;%)</b>           | 27 (30.7%)                                  | 6 (6.8%)                                         | 65 (73.9%)                                                         |                                             |                                                  |                                                    |
| <b>Patients<br/>meeting<br/>criteria for<br/>treatment<br/>(n;%)</b> | 12 (13.6%)                                  | 3 (3.4%)                                         | 38 (43.2%)                                                         | 2 (2.3%)                                    | 1 (1.1%)                                         | 22 (25.0%)                                         |

## References

1. <http://guidance.nice.org.uk/CG/Wave25/2>. [accessed 01/11/2012].
2. Kanis JA, Johnell O, Oden A, et al. FRAX and the assessment of fracture probability in men and women from the UK. *Osteoporosis international : a journal established as result of cooperation between the European Foundation for Osteoporosis and the National Osteoporosis Foundation of the USA*. 2008;19(4):385-97. Epub 2008/02/23.
3. Hippisley-Cox J, Coupland C. Derivation and validation of updated QFracture algorithm to predict risk of osteoporotic fracture in primary care in the United Kingdom: prospective open cohort study. *BMJ*. 2012;344:e3427. Epub 2012/05/24.
4. Dobson R, Ramagopalan S, Giovannoni G. Bone health and multiple sclerosis. *Multiple Sclerosis*. 2012. Epub 2012/06/29.
5. Dennison EM, Compston JE, Flahive J, et al. Effect of co-morbidities on fracture risk: Findings from the Global Longitudinal Study of Osteoporosis in Women (GLOW). *Bone*. 2012. Epub 2012/03/20.
6. Bazelier MT, van Staa TP, Uitdehaag BM, et al. A simple score for estimating the long-term risk of fracture in patients with multiple sclerosis. *Neurology*. 2012. Epub 2012/08/17.
7. Weinschenker BG, Bass B, Rice GP, et al. The natural history of multiple sclerosis: a geographically based study. I. Clinical course and disability. *Brain*. 1989;112 ( Pt 1):133-46. Epub 1989/02/01.
8. Borgstrom F, Johnell O, Kanis JA, et al. At what hip fracture risk is it cost-effective to treat? International intervention thresholds for the treatment of osteoporosis. *Osteoporos Int*. 2006;17(10):1459-71. Epub 2006/07/19.
9. Kanis JA, McCloskey EV, Johansson H, et al. Case finding for the management of osteoporosis with FRAX--assessment and intervention thresholds for the UK. *Osteoporos Int*. 2008;19(10):1395-408. Epub 2008/08/30.
10. <http://www.shef.ac.uk/NOGG/index.html>. [accessed 01/11/2012].
11. Bland JM, Altman DG. Statistical methods for assessing agreement between two methods of clinical measurement. *Lancet*. 1986;1(8476):307-10. Epub 1986/02/08.
12. Murad MH, Drake MT, Mullan RJ, et al. Clinical review. Comparative effectiveness of drug treatments to prevent fragility fractures: a systematic review and network meta-analysis. *J Clin Endocrinol Metab*. 2012;97(6):1871-80. Epub 2012/04/03.
13. Johansen A. QFracture is better than FRAX tool in assessing risk of hip fracture. *BMJ*. 2012;345:e4988. Epub 2012/07/25.
14. Khan NF, Harrison SE, Rose PW. Validity of diagnostic coding within the General Practice Research Database: a systematic review. *The British journal of general practice : the journal of the Royal College of General Practitioners*. 2010;60(572):e128-36. Epub 2010/03/06.
15. Wood B, van der Mei I, Ponsonby AL, et al. Prevalence and concurrence of anxiety, depression and fatigue over time in multiple sclerosis. *Mult Scler*. 2012. Epub 2012/06/26.

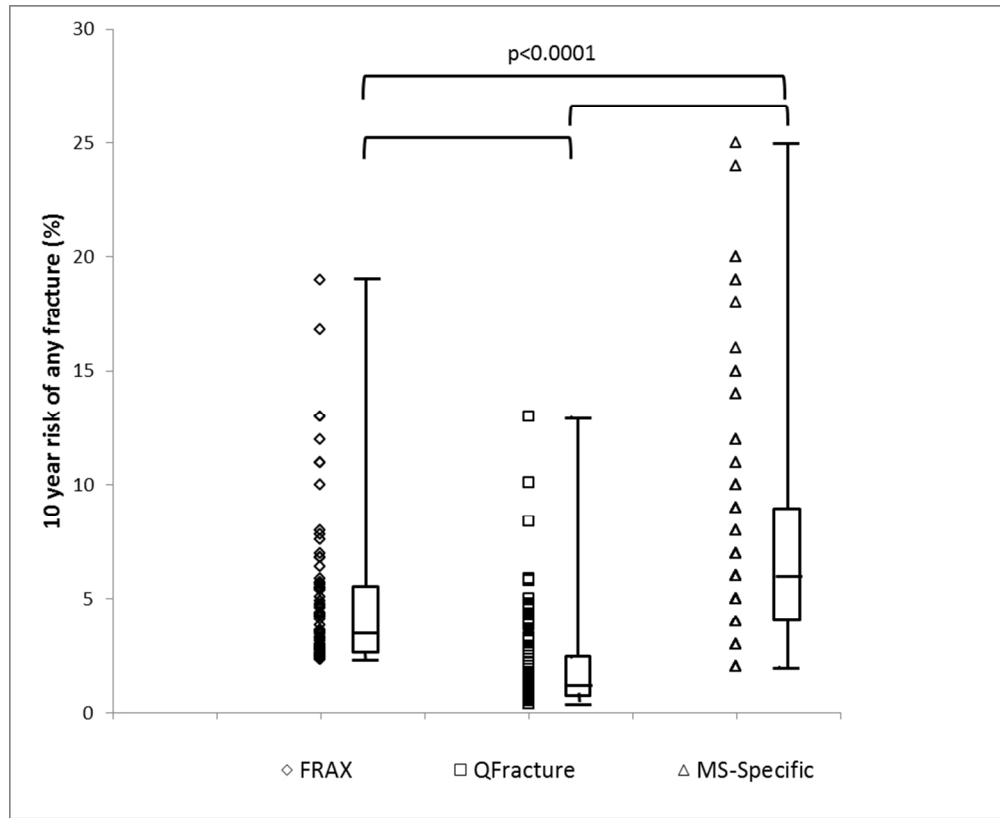

84x68mm (300 x 300 DPI)

ew only

1  
2  
3  
4  
5  
6  
7  
8  
9  
10  
11  
12  
13  
14  
15  
16  
17  
18  
19  
20  
21  
22  
23  
24  
25  
26  
27  
28  
29  
30  
31  
32  
33  
34  
35  
36  
37  
38  
39  
40  
41  
42  
43  
44  
45  
46  
47  
48  
49  
50  
51  
52  
53  
54  
55  
56  
57  
58  
59  
60

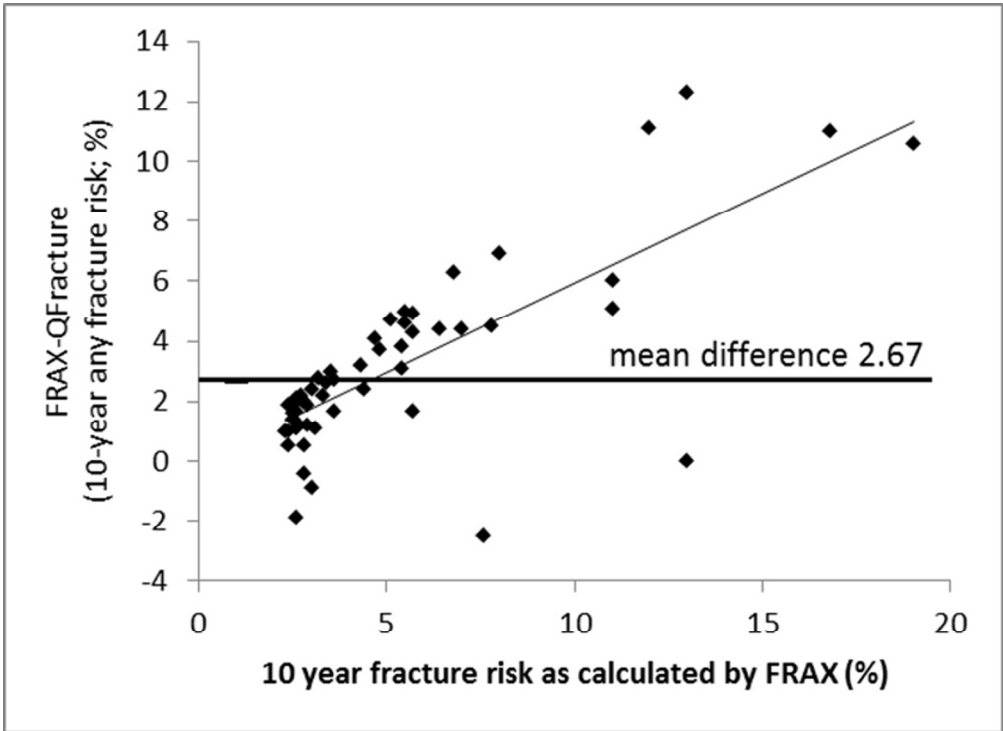

84x61mm (300 x 300 DPI)

View only

1  
2  
3  
4  
5  
6  
7  
8  
9  
10  
11  
12  
13  
14  
15  
16  
17  
18  
19  
20  
21  
22  
23  
24  
25  
26  
27  
28  
29  
30  
31  
32  
33  
34  
35  
36  
37  
38  
39  
40  
41  
42  
43  
44  
45  
46  
47  
48  
49  
50  
51  
52  
53  
54  
55  
56  
57  
58  
59  
60

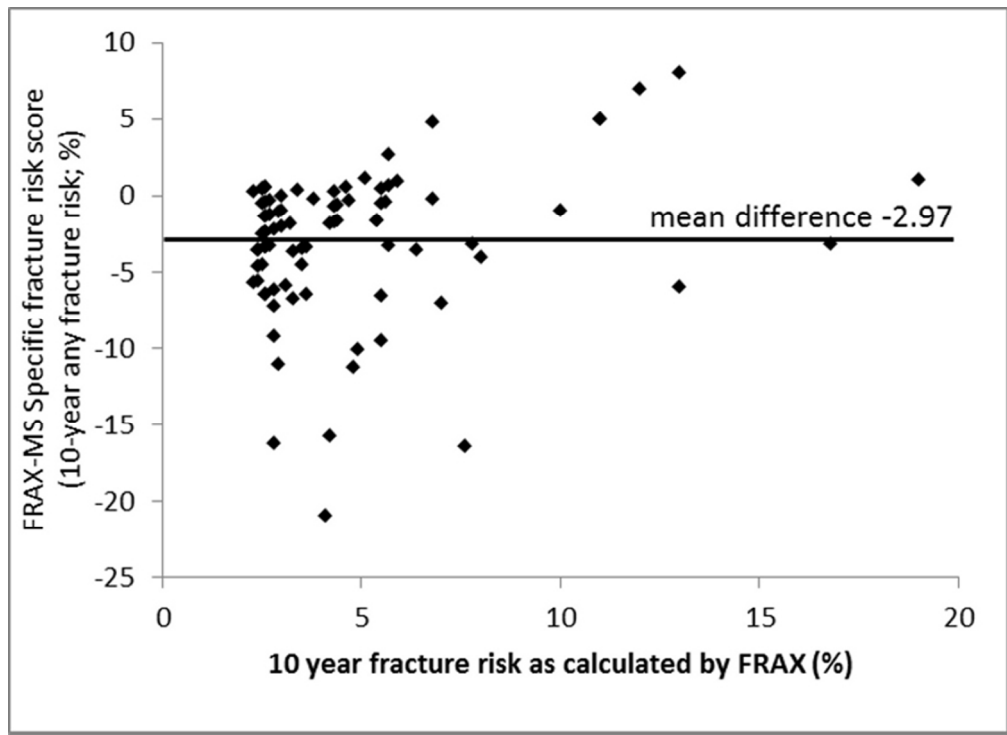

84x61mm (300 x 300 DPI)

View only

1  
2  
3  
4  
5  
6  
7  
8  
9  
10  
11  
12  
13  
14  
15  
16  
17  
18  
19  
20  
21  
22  
23  
24  
25  
26  
27  
28  
29  
30  
31  
32  
33  
34  
35  
36  
37  
38  
39  
40  
41  
42  
43  
44  
45  
46  
47  
48  
49  
50  
51  
52  
53  
54  
55  
56  
57  
58  
59  
60

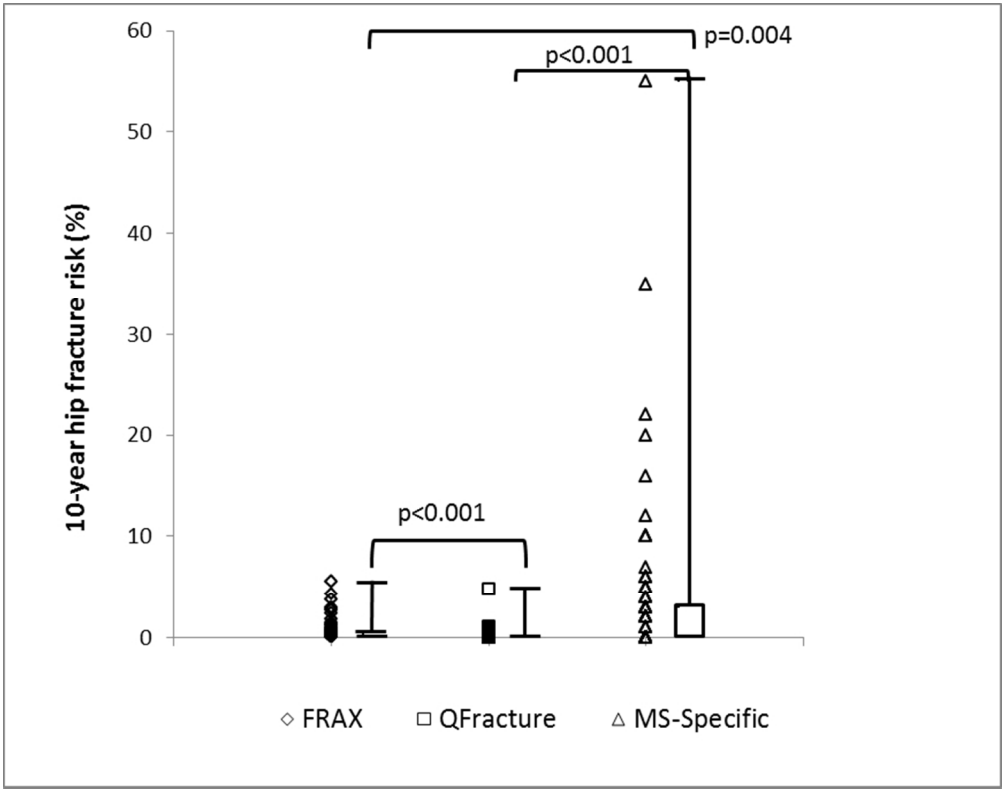

73x57mm (300 x 300 DPI)

ew only



**Assessing fracture risk in people with MS: a service development study comparing three fracture risk scoring systems**

|                                 |                                                                                                                                                                                                                                                                               |
|---------------------------------|-------------------------------------------------------------------------------------------------------------------------------------------------------------------------------------------------------------------------------------------------------------------------------|
| Journal:                        | <i>BMJ Open</i>                                                                                                                                                                                                                                                               |
| Manuscript ID:                  | bmjopen-2012-002508.R1                                                                                                                                                                                                                                                        |
| Article Type:                   | Research                                                                                                                                                                                                                                                                      |
| Date Submitted by the Author:   | 31-Jan-2013                                                                                                                                                                                                                                                                   |
| Complete List of Authors:       | Dobson, Ruth; Queen Mary University London, Blizard Institute<br>Leddy, Sara; Queen Mary University London, Blizard Institute<br>Gangadharan, Sunay; Queen Mary University London, Blizard Institute<br>Giovannoni, Gavin; Queen Mary University of London, Blizard Institute |
| <b>Primary Subject Heading</b>: | Neurology                                                                                                                                                                                                                                                                     |
| Secondary Subject Heading:      | Evidence based practice                                                                                                                                                                                                                                                       |
| Keywords:                       | Multiple sclerosis < NEUROLOGY, Osteoporosis, Fracture                                                                                                                                                                                                                        |
|                                 |                                                                                                                                                                                                                                                                               |

SCHOLARONE™  
Manuscripts

1  
2  
3 **Assessing fracture risk in people with MS: a service development study comparing three fracture**  
4 **risk scoring systems**  
5

6 R Dobson MA MRCP, SG Leddy BA, S Gangadharan, G Giovannoni PhD, FRCP  
7

8 R Dobson: Clinical Research Fellow and Honorary SpR Neurology  
9

10 SG Leddy and S Gangadharan: Medical Students  
11

12 G Giovannoni: Professor of Neurology  
13

14 Address for all authors: Blizard Institute, Queen Mary University of London, Barts and the London  
15

16 School of Medicine and Dentistry, London, UK  
17  
18  
19  
20  
21

22 Corresponding author: Dr Ruth Dobson; Blizard Institute, 4 Newark Street, London, E1 2AT.  
23

24 Telephone 0207 882 2282 email [ruth.dobson@qmul.ac.uk](mailto:ruth.dobson@qmul.ac.uk)  
25  
26

27 Guarantor: Professor G Giovannoni; Blizard Institute, 4 Newark Street, London, E1 2AT. Email  
28

29 [g.giovannoni@qmul.ac.uk](mailto:g.giovannoni@qmul.ac.uk)  
30  
31  
32  
33  
34

35 **Research Article**

36 **Keywords:** Multiple Sclerosis, osteoporosis, fracture.  
37

38 **Abstract:** 245 words  
39

40 **Paper:** 2788 words  
41

42 **21 references**  
43

44 **3 figures and 3 tables**  
45

46 **Running head:** Assessing fracture risk in MS  
47  
48  
49  
50  
51  
52  
53  
54  
55  
56  
57  
58  
59  
60



**Abstract**

**Objectives:** Suboptimal bone health is increasingly recognised as an important cause of morbidity. Multiple sclerosis (MS) has been consistently associated with an increased risk of osteoporosis and fracture. Various fracture risk screening tools have been developed, two of which are in routine use, and a further one is MS-specific. We set out to compare the results obtained by these in the MS clinic population.

**Design:** This was a service development study. The 10-year risk estimates of any fracture and hip fracture generated by each of the algorithms were compared.

**Setting and participants:** 88 patients with a confirmed diagnosis of MS who were attending the MS clinic at the Royal London Hospital were assessed.

**Outcome measures:** Mean 10-year overall fracture risk and hip fracture risk were calculated using each of the three fracture risk calculators. The number of interventions that would be required as a result of using each of these tools were also compared.

**Results:** Mean 10-year fracture risk was 4.7%, 2.3% and 7.6% using FRAX, QFracture and the MS-specific calculator respectively ( $p < 0.0001$  for difference). The agreement between risk scoring tools was poor at all levels of fracture risk.

**Conclusions:** The agreement between these three fracture risk scoring tools is poor in the MS population. Further work is required to develop and validate an accurate fracture risk scoring system for use in MS.

**Trial registration:** This service development study was approved by the Clinical Effectiveness Department at Barts Health NHS Trust (project registration number 156/12).

## Article summary

### Article focus:

- Recent National Institute of Clinical Excellence (NICE) guidelines in the UK recommend assessing bone health using one of two validated scoring systems, FRAX and QFracture in those at risk of fragility fracture. However, these fracture risk scoring systems do not take into account all risks associated with fragility fractures.
- Multiple sclerosis (MS) has been associated with an increased hazard ratio of hip fracture, and was one of the two neurological conditions significantly associated with an increased risk of fracture in the Global Longitudinal study of Osteoporosis in Women (GLOW) study.
- This study therefore set out to compare existing fracture risk scoring algorithms in a multiple sclerosis clinic, in order to assess both the effect of using each of the algorithms on further investigations and treatment, and to assess whether the algorithms provide similar results in this clinic population.

### Key messages:

- The agreement between fracture risk calculators is poor, with QFracture consistently giving lower risk estimates than FRAX.
- Whilst reducing fracture risk should be a priority to all clinicians dealing with chronic conditions associated with an increased risk of fracture, there must be consistency in the way in which fracture risk is calculated. A prospective study is urgently required in order that we can determine the best way to predict and prevent fractures.

### Strengths and limitations:

- To the best of our knowledge, this is the first study to directly compare fracture risk scoring tools in the MS clinic population, assessing the rate of interventions that would be indicated by using each tool

- This study is of relatively small sample size, however it provides important pilot data to support further work in this area.
- The lack of longitudinal follow up does not allow us to fully assess the relative accuracy of each tool. Further longitudinal prospective studies are required.

For peer review only

## Introduction

Suboptimal bone health is increasingly recognised as an important cause of morbidity. Recent National Institute of Clinical Excellence (NICE) guidelines in the UK (1) recommend assessing bone health using one of two validated scoring systems, FRAX and QFracture, in those at risk of fragility fracture (2, 3). These scores, both of which have been generated from and validated against large databases, allow the calculation an individuals' 10-year fracture risk, both in terms of any fracture and hip fracture. NICE guidelines currently recommend the calculation of fracture risk before proceeding to DXA imaging (1).

However, these fracture risk scoring systems do not take into account all risks associated with fragility fractures. Multiple sclerosis (MS) has been associated with a hazard ratio of hip fracture of 1.9 – 4.08 (4), and was one of the two neurological conditions significantly associated with an increased risk of fracture in the Global Longitudinal study of Osteoporosis in Women (GLOW) study (HR of any fracture in MS 1.7; 95%CI 1.2-2.6) (5). There have been recent efforts to develop a fracture risk calculator that takes into account the increased risk of fracture and osteoporosis associated with MS (6). However, this calculator has been developed from a single database, the UK General Practice Database, and has not been validated to date.

There are common factors associated with an increased risk of developing MS and an increased fracture risk, such as vitamin D deficiency and smoking. It therefore seems likely that the increased fracture risk associated with MS develops early in the disease (4). Indeed, it has been shown that the lowered bone mineral density associated with MS develops whilst patients remain fully mobile (4). This leads to problems using fracture risk assessment tools, as the FRAX algorithm has the lower age limit set at 40 years, whilst in the QFracture algorithm the lowest age is 30. The mean age of MS diagnosis is approximately 29 (7), implying that many patients are first seen at a relatively young age.

1  
2  
3 It has been argued that the 10-year fracture risk at which intervention becomes cost-effective varies  
4  
5 according to the country in which the societal cost is modelled (8). For a 50-year-old individual, the  
6  
7 10-year fracture risk at which it becomes cost-effective to intervene may be as low as 0.84% in the  
8  
9 UK (a relative risk of osteoporotic fracture of 1.83 compared to the general population, similar to  
10  
11 that associated with MS; in the USA treatment at a relative risk of 1.31 is thought to be cost-  
12  
13 effective) (8). This highlights the importance of fracture risk screening in the MS clinic population.  
14

15  
16 Given the importance of fracture risk screening in the MS population and the uncertainty regarding  
17  
18 which risk calculator to use we set out to compare the three fracture risk calculator systems in the  
19  
20 MS outpatient clinic population. This study enables direct comparison of the fracture risk estimates  
21  
22 generated by these three studies in addition to examining the number of interventions that the use  
23  
24 of each of these calculators would result in.  
25  
26

## 27 28 **Methods**

### 29 30 *Patient selection and data collection*

31  
32 This service development study was approved by the Clinical Effectiveness Department at Barts  
33  
34 Health NHS Trust (project registration number 156/12). 100 patients with clinically definite MS  
35  
36 attending either the MS outpatient clinic or the Neurology Daycase Unit were assessed. Sufficient  
37  
38 data to enable fracture risk scoring was available on 88 patients (see **table 1** for details of data  
39  
40 required for each fracture risk calculator). The use of an assistive device for walking together with  
41  
42 details regarding MS duration and treatment, previous DXA imaging, previous fragility or other  
43  
44 fracture, and medications used for the treatment of reduced bone mineral density were also  
45  
46 recorded.  
47  
48  
49  
50

### 51 52 *Fracture risk scoring*

53  
54  
55 10 year risk of both “any fracture” and “hip fracture” were assessed using the FRAX scoring  
56  
57 algorithm (2), the QFracture algorithm (3) and the recently proposed MS-specific fracture risk score  
58  
59  
60

1  
2  
3 algorithm (6). As the FRAX score algorithm only allows a minimum age of 40 years, patients aged <40  
4  
5 were assigned an age of 40 for the purposes of this calculation. The QFracture algorithm allows a  
6  
7 minimum age of 30, and so patients aged <30 were assigned an age of 30. The MS-specific fracture  
8  
9 risk calculator does not have a lower age cut-off. A result of this was that patients aged <40 were  
10  
11 assigned different ages in at least two of the risk calculations. A subgroup analysis was performed  
12  
13 including only those patients aged 40 or over, in order to assess whether the inclusion of patients  
14  
15 younger than the cut-off age had affected the results.  
16  
17

18  
19 In order to assess the number of patients who would require DXA imaging and/or treatment, an  
20  
21 imaging threshold of a 10-year fracture risk for any fracture of >5% was assigned. The treatment  
22  
23 threshold was taken to be a 10-year fracture risk of >7% for any fracture, and >4% for hip fracture.  
24  
25 The UK National Osteoporosis Guideline Group (NOGG) has estimated that in the UK pharmacologic  
26  
27 treatment is cost effective at all ages when the 10-year probability of major osteoporotic fracture  
28  
29 exceeds 7% (9). In practice, the UK NOGG recommends an age-dependent intervention threshold,  
30  
31 which ranges from 1 10-year fracture risk of 7.5 – 30% for ages 50 to 80 years (10). However, these  
32  
33 figures are, if anything, somewhat conservative as discussed above.  
34  
35

### 36 37 *Statistical analysis*

38  
39 Statistical analysis was performed using PASW v18.0 (SPSS). Risk score distributions were assessed  
40  
41 for normality using a Shapiro-Wilk test, and attempts made to normalise the data using a natural log  
42  
43 transformation. As it proved impossible to normalise the data, non-parametric statistical tests were  
44  
45 used. The absolute risk scores generated by each fracture risk score were directly compared using  
46  
47 the Friedman test. Scores were then compared between pairs of risk scoring systems using the  
48  
49 Wilcoxon signed rank test.  
50  
51

52  
53 The agreement between individual scores was assessed using a Bland-Altman plot (11). This method  
54  
55 allows a visual description of both the agreement between scores, in addition to demonstrating any  
56  
57  
58  
59  
60

1  
2  
3 systematic or significant proportional errors between the two sets of results (11). A further analysis  
4  
5 was performed by putting the scores obtained into rank order, and separating them into rank order  
6  
7 quintiles, an accepted technique used in the MS literature (12, 13). The agreement between  
8  
9 quintiles was then compared using the kappa coefficient. Finally, the proportion of individuals  
10  
11 meeting the pre-set criteria for DXA imaging and potential treatment intervention was compared  
12  
13 using Fishers exact test.  
14

## 15 16 17 **Results**

### 18 19 *Subjects*

20  
21  
22 Of 100 patients recruited, 88 gave sufficient information to allow their 10-year fracture risk to be  
23  
24 accurately calculated using the three algorithms. Demographic details of these patients are given in  
25  
26 **table 2**. Mean disease duration was 7.96 years (range 0-30); 76/88 patients were receiving disease  
27  
28 modifying treatment (see table 2 for more information). 42/100 patients used a walking aid; of  
29  
30 whom 8 required bilateral assistance and 4 used a wheelchair to mobilise. Of the four patients using  
31  
32 a wheelchair to mobilise, two were ambulatory with bilateral assistance for short distances, and two  
33  
34 were essentially confined to the wheelchair, requiring assistance to transfer. Of the 88 patients who  
35  
36 had their fracture risk calculated, 37 (42%) used a walking aid; of these 6 (7%) required bilateral  
37  
38 assistance, 2 (2%) used a wheelchair for longer distances only and 1 (1%) was essentially wheelchair  
39  
40 bound. 49/100 patients reported falling in the preceding 6 months; of the 88 with full fracture risk  
41  
42 data 48 (54.5%) reported a history of falls. 22 (52%) patients using a walking aid reported falls in the  
43  
44 preceding 6 months compared to 28% of those who did not require a walking aid. No patients had a  
45  
46 history of a prior fracture meeting the definition of a fragility fracture (14).  
47  
48  
49

### 50 51 *Fracture risk*

#### 52 53 54 55 *a. 10 year risk of any fracture*

56  
57  
58  
59  
60

1  
2  
3 Mean 10-year fracture risk was 4.7% assessed by FRAX (standard deviation; SD 3.20, range 2.3-19.0),  
4  
5 2.3% assessed by QFracture (SD 2.14, range 0.4-13.0) and 7.6% using the MS-specific calculator (SD  
6  
7 5.05, range 2.0-25.0) (**table 3**). Despite efforts it was not possible to normalise the distribution for  
8  
9 any of the fracture risk scores. There was an overall significant difference between the scores  
10  
11 generated by the three algorithms ( $p < 0.001$ ; Friedman test), which was preserved on pairwise  
12  
13 testing ( $p < 0.001$  for all comparisons, Wilcoxon signed rank test) (**table 3 and figure 1a**).

14  
15  
16 Bland-Altman plots revealed reasonable agreement between FRAX and QFracture at lower fracture  
17  
18 risk scores, but for those patients with higher fracture risk a systematic error was apparent with  
19  
20 QFracture consistently giving lower risk estimates than FRAX (mean difference 2.68) (**figure 2a**).  
21  
22 When FRAX and the MS-specific risk score were compared the agreement was poor, with FRAX  
23  
24 consistently lower than the MS-specific score (mean difference 2.97) (**figure 2b**). The same could be  
25  
26 seen when QFracture and the MS-specific risk score were compared (mean difference 5.60; data not  
27  
28 shown).  
29  
30

31  
32  
33 Given that 50 of the patients were younger than 40, the minimum age used in the FRAX calculation,  
34  
35 the results obtained for the 38 patients aged 40 or over were compared in a sub-group analysis. This  
36  
37 revealed similar results to those obtained when all patients were included (**figure 1b**). The highly  
38  
39 significant difference in the results obtained by all three fracture risk scores remained ( $p < 0.001$  for  
40  
41 all comparisons, Wilcoxon signed rank test).  
42  
43

44  
45 Kappa coefficient was calculated for the agreement between rank quintiles for pairs of fracture risk  
46  
47 scores. All comparisons generated a low kappa value, indicative of poor agreement between rank  
48  
49 quintile assignment (FRAX vs. QFracture: kappa 0.065, 95%CI -0.05-0.181, weighted kappa 0.133;  
50  
51 FRAX vs. MS-specific score: kappa 0.084, 95%CI -0.029-0.197, weighted kappa 0.225, QFracture vs.  
52  
53 MS-specific score: kappa 0.114 95%CI -0.006-0.235, weighted kappa 0.057).  
54  
55  
56  
57  
58  
59  
60



1  
2  
3 The number of patients who met the pre-determined criteria for DXA imaging and treatment are  
4 given in **table 3**. There was a significant difference between all three groups for both DXA imaging  
5 ( $p < 0.0001$  for all comparisons) and treatment ( $p = 0.03$  when comparing FRAX and QFracture,  
6 otherwise  $p < 0.0001$ ). Of the six patients who had previously undergone DXA imaging, 3 met the  
7 criteria for imaging using either the FRAX or MS-specific risk score. None met the fracture risk cut-off  
8 for imaging using the QFracture algorithm. Of the six patients who had undergone DXA imaging, four  
9 were on no treatment; one patient was taking calcium supplementation and one HRT. None of the  
10 patients had been diagnosed with osteoporosis.

11  
12  
13  
14  
15  
16  
17  
18  
19  
20  
21 *b. 10 year risk of hip fracture*

22  
23  
24 Mean 10-year hip fracture risk was 0.7% assessed by FRAX (standard deviation; SD 0.95, range 0.1-  
25 5.6), 0.2% assessed by QFracture (SD 0.55, range 0.0-4.8) and 3.4% using the MS-specific calculator  
26 (SD 7.78, range 0.0-55.0) (**table 3**). Again, it was not possible to normalise the distribution for any of  
27 the fracture risk scores. There was an overall significant difference between the scores generated by  
28 the three algorithms ( $p < 0.001$ ; Friedman test), which was preserved on pairwise testing ( $p = 0.004$  for  
29 comparison of FRAX and MS-specific risk calculator,  $p < 0.001$  for other comparisons, Wilcoxon signed  
30 rank test) (**table 3 and figure 3a**). Again, when only those aged 40 or over were analysed separately,  
31 the significant difference between the 10 year fracture risk generated by the fracture risk calculators  
32 differed significantly (**figure 3b**). Agreement between rank quintiles was poor (FRAX vs. QFracture:  
33 kappa 0.022, 95%CI -0.108-0.152, weighted kappa 0.033; FRAX vs. MS-specific score: kappa 0.016,  
34 95%CI -0.096-0.129, weighted kappa 0.107, QFracture vs. MS-specific score: kappa 0.165 95%CI  
35 0.035-0.295, weighted kappa 0.235).

36  
37  
38  
39  
40  
41  
42  
43  
44  
45  
46  
47  
48  
49  
50  
51 The comparison of scores generated similar Bland-Altman plots to those seen when examining the  
52 data for overall fracture risk (data not shown). There was no significant difference between FRAX  
53 and QFracture in the number of patients who met the predetermined treatment threshold, however  
54  
55  
56  
57  
58  
59  
60

1  
2  
3 both differed significantly from the MS-specific fracture risk calculator ( $p < 0.0001$  for both  
4  
5 comparisons).

## 8 Discussion

10 From the results presented above it can be seen that the agreement between the three fracture risk  
11  
12 calculators is poor in this population, both in absolute terms and when examining rank quintiles.  
13  
14 There have been previous attempts to compare the results obtained by FRAX and QFracture  
15  
16 (15)(16), and these have highlighted similar issues (17). When the authors of the MS-specific score  
17  
18 compared the scores generated by their model to those generated by the FRAX algorithm, they  
19  
20 found that FRAX appeared to significantly underestimate fracture risk for patients with MS,  
21  
22 especially with regard to hip fracture (6).  
23  
24

25  
26 One failure of the FRAX algorithm is that it does not allow the calculation of accurate risk for those  
27  
28 aged  $< 40$ ; as the majority of our patients were aged between 20 and 40, this could represent a  
29  
30 source of error. However, the findings did not differ significantly when only those patients aged 40  
31  
32 or over were included. A significant limitation of this study was the relatively small sample size  
33  
34 ( $n=88$ ), which was further reduced in the subgroup analysis of those patients aged 40 or over ( $n=38$ ).  
35  
36 This must be borne in mind when interpreting the results; however, the magnitude of the  
37  
38 differences cannot be ignored.  
39  
40  
41

42  
43 The FRAX algorithm has previously been criticised for not incorporating factors such as falls (15);  
44  
45 whilst this is a significant omission, it would be expected that this would lead to an underestimation  
46  
47 of risk when using this calculator. However, the QFracture algorithm, which does incorporate falls  
48  
49 into the calculation, gave consistently lower fracture risk scores than the FRAX calculator. This may  
50  
51 be due to a more accurate estimate of age-specific risk, as the QFracture allows the imputation of  
52  
53 age from age 30. However, despite including Parkinson's disease as a factor, the QFracture calculator  
54  
55 does not include MS.  
56  
57  
58  
59  
60

1  
2  
3 The MS-specific calculator appeared to consistently over-estimate fracture risk. Whilst one might  
4  
5 imagine that this would be the most accurate of the risk calculators, the number of patients judged  
6  
7 to be over either the investigation or treatment threshold was far higher than expected. This risk  
8  
9 calculator was generated from the UK General Practice database. It incorporates a number of factors  
10  
11 into the risk calculator that are not captured by other risk calculators, such as recent steroid use (as  
12  
13 a surrogate for relapses) and fatigue (hip fracture risk calculation only). However, it has previously  
14  
15 been shown that coding is of variable accuracy in the GP database (18). As most short courses of  
16  
17 intravenous steroid are given in secondary care, it is not inconceivable that these would not be  
18  
19 captured accurately. Additionally, whilst more than half of patients with MS report fatigue when  
20  
21 directly questioned (19), it is likely that only those with the very highest levels of fatigue have this  
22  
23 recorded by their General Practitioners.  
24  
25

26  
27 The lack of agreement between the fracture risk calculation tools is likely to be, at least in part, a  
28  
29 result of the ways in which they have been developed. FRAX was developed using fracture incidence  
30  
31 rates in the UK general population, whilst the other two calculators have been generated from the  
32  
33 UK General Practice database. Differences in fracture reporting and recording, together with  
34  
35 differences in the recording of fracture risk factors between these databases are likely to contribute  
36  
37 to the differences between the results generated in the population studied. This study highlights the  
38  
39 fact that the results generated from one fracture risk scoring tool cannot be substituted for those  
40  
41 generated by another, and consistent use of a single tool within a population is required to stratify  
42  
43 risk in that population. Similarly, the thresholds for further investigation or treatment are likely to  
44  
45 vary between the risk scoring tools. The NOGG guidance (9) has been developed with reference to  
46  
47 the FRAX tool, and so should be used in conjunction with this.  
48  
49

50  
51 To date, there are no papers examining primary prevention of osteoporosis or osteoporotic fractures  
52  
53 in MS. There is also a need to assess the effect of MS disease modifying treatments on fracture risk.  
54  
55 Whether MS disease modifying treatments have any effect on BMD outside of a general beneficial  
56  
57  
58  
59  
60

1  
2  
3 effect on bone health through the maintenance of weight-bearing mobility remains controversial.  
4  
5 Theoretically interferon-beta preparations should protect against bone mineral loss in MS through  
6  
7 induction of the tumour necrosis factor related apoptosis-inducing ligand (TRAIL) (20). There is a  
8  
9 single paper demonstrating that people with MS treated with interferon-beta had z-scores  
10  
11 significantly greater than zero (21), but there was no control group in this study, meaning that it is  
12  
13 impossible to draw any firm conclusions regarding this. There remains much work to be done with  
14  
15 regard to assessing fracture risk in the MS population, who are at high risk of fracture and associated  
16  
17 complications. Whilst reducing fracture risk should be a priority to all clinicians dealing with chronic  
18  
19 conditions associated with an increased risk of fracture, there must be consistency in the way in  
20  
21 which fracture risk is calculated. A prospective study in the MS population, encompassing both  
22  
23 fracture risk calculation and bone densitometry estimation using DXA is urgently needed in order  
24  
25 that we can determine the best way to assess the risk of, and act to prevent fractures.  
26  
27  
28  
29  
30  
31  
32  
33  
34  
35  
36  
37  
38  
39  
40  
41  
42  
43  
44  
45  
46  
47  
48  
49  
50  
51  
52  
53  
54  
55  
56  
57  
58  
59  
60

### Contributorship

RD and GG conceived the idea of this study. RD, SGL and SG performed fracture risk scoring. RD performed the statistical analysis and initially drafted the paper. All authors provided input into the final manuscript.

The Corresponding Author has the right to grant on behalf of all authors and does grant on behalf of all authors, an exclusive licence (or non exclusive for government employees) on a worldwide basis to the BMJ Publishing Group Ltd to permit this article (if accepted) to be published in BMJ editions and any other BMJ PGL products and sublicences such use and exploit all subsidiary rights, as set out in our licence."

### Ethical approval

This service development study was approved by the Clinical Effectiveness Department at Barts Health NHS Trust (project registration number 156/12).

### Conflicts of interest

RD, SGL and SG have no conflicts of interest to declare.

GG has received research grant support from Bayer-Schering Healthcare, Biogen-Idec, GW Pharma, Merck Serono, Merz, Novartis, Teva and Sanofi-Aventis. GG has received personal compensation for participating on Advisory Boards in relation to clinical trial design, trial steering committees and data and safety monitoring committees from: Bayer-Schering Healthcare, Biogen-Idec, Eisai, Elan, Fiveprime, Genzyme, Genentech, GSK, Ironwood, Merck-Serono, Novartis, Pfizer, Roche, Sanofi-Aventis, Synthon BV, Teva, UCB Pharma and Vertex Pharmaceuticals.

### Funding

RD is funded by an Association of British Neurologists/MS Society of Great Britain Clinical Research Fellowship.

1  
2  
3  
4  
5  
6  
7  
8  
9  
10  
11  
12  
13  
14  
15  
16  
17  
18  
19  
20  
21  
22  
23  
24  
25  
26  
27  
28  
29  
30  
31  
32  
33  
34  
35  
36  
37  
38  
39  
40  
41  
42  
43  
44  
45  
46  
47  
48  
49  
50  
51  
52  
53  
54  
55  
56  
57  
58  
59  
60

GG receives grant support from the MRC, National MS Society, MS Society of Great Britain and Northern Ireland, AIMS2CURE and the Roan Charitable Trust.

For peer review only

### Figure legends

**Table 1:** Data used in the calculation of fracture risk for each of the three risk scoring algorithms used

**Table 2:** Patient details

**Table 3:** 10 year any fracture risks generated by each of the three fracture risk scoring algorithms

**Figure 1: (a)** Combined scatter and box-and-whisker plot demonstrating 10-year any fracture risk generated by each of the three risk scoring algorithms. The box represents the 25<sup>th</sup>-75<sup>th</sup> centile bisected by the median, with the whiskers the range. **(b)** 10-year any fracture risks generated by each of the three risk scoring algorithms for those patients aged 40 or over only. The box represents the 25<sup>th</sup>-75<sup>th</sup> centile bisected by the median, with the whiskers the range.

**Figure 2: (a)** Bland-Altman plot comparing FRAX and QFracture scores for 10-year risk of any fracture. **(b)** Bland-Altman plot comparing FRAX and MS-specific scores for 10-year risk of any fracture

**Figure 3: (a)** 10-year hip fracture risks generated by each of the three risk scoring algorithms for all patients. The box represents the 25<sup>th</sup>-75<sup>th</sup> centile bisected by the median, with the whiskers the range. **(b)** 10-year hip fracture risks generated by each of the three risk scoring algorithms for those patients aged 40 or over only. The box represents the 25<sup>th</sup>-75<sup>th</sup> centile bisected by the median, with the whiskers the range.

**Table 1:** Data used in the calculation of fracture risk for each of the three risk scoring algorithms

| FRAX                            | QFracture                                                | MS-specific calculator                                                |
|---------------------------------|----------------------------------------------------------|-----------------------------------------------------------------------|
| Age                             | Age                                                      | Age                                                                   |
| Sex                             | Sex                                                      | Sex                                                                   |
| Weight; height; BMI             | Weight; height; BMI                                      | BMI                                                                   |
| Previous fracture               | Previous fragility fracture                              | Previous fracture (any fracture only)                                 |
| Parental hip fracture           | Parental osteoporosis or hip fracture                    |                                                                       |
| Current smoking                 | Current or previous smoking, number of cigarettes smoked | Current smoking                                                       |
| Glucocorticoid exposure         | Regular glucocorticoid exposure                          | Use of PO/IV glucocorticoids in the prior 6 months                    |
| Rheumatoid arthritis            | Rheumatoid arthritis or SLE                              |                                                                       |
| Secondary osteoporosis          |                                                          |                                                                       |
| Alcohol >3 units/day            | Alcohol number of units/day                              |                                                                       |
| Femoral neck DXA (if available) |                                                          |                                                                       |
|                                 | Ethnicity                                                |                                                                       |
|                                 | Diabetes                                                 |                                                                       |
|                                 | Nursing/care home residence                              |                                                                       |
|                                 | Falls                                                    | History of falling 3 months – 1 year before                           |
|                                 | Dementia                                                 |                                                                       |
|                                 | Cancer                                                   |                                                                       |
|                                 | Asthma/COPD                                              |                                                                       |
|                                 | Heart attack, angina, stroke, TIA                        |                                                                       |
|                                 | Chronic liver disease                                    |                                                                       |
|                                 | Chronic kidney disease                                   |                                                                       |
|                                 | Parkinson's disease                                      |                                                                       |
|                                 | Malabsorption including Crohn's disease                  |                                                                       |
|                                 | Endocrine problems including thyroid dysfunction         |                                                                       |
|                                 | Epilepsy/anticonvulsant exposure                         | Use of anticonvulsants in the prior 6 months (any fracture risk only) |
|                                 | Antidepressants                                          | Use of antidepressants in the prior 6 months                          |
|                                 | Oestrogen-only HRT                                       |                                                                       |
|                                 |                                                          | History of fatigue in the prior 6 months (hip fracture only)          |

**BMI:** body mass index

**Glucocorticoid exposure:** defined as currently exposure to oral glucocorticoids or previous exposure to oral glucocorticoids for more than 3 months at a dose of prednisolone of 5mg daily or more (or equivalent doses of other glucocorticoids).



**Secondary osteoporosis:** defined as a disorder strongly associated with osteoporosis. These include type I (insulin dependent) diabetes, osteogenesis imperfecta in adults, untreated long-standing hyperthyroidism, hypogonadism or premature menopause (<45 years), chronic malnutrition, or malabsorption and chronic liver disease.

**PO:** oral

**IV:** intravenous

**Table 2:** Patient details

| Characteristic                 | Patients (n=88)                                   |
|--------------------------------|---------------------------------------------------|
| Age (mean; range)              | 37.5 years (22-56)                                |
| Female (n;%)                   | 55 (62.5%)                                        |
| Disease duration (mean; range) | 7.96 years (0-30)                                 |
| Disease modifying therapy      | 76/88 (86.4%) receiving disease modifying therapy |
|                                | 5/88 (5.7%) glatiramer acetate (Copaxone)         |
|                                | 15/88 (17.0%) interferon beta preparations        |
|                                | 56/88 (63.6%) natalizumab (Tysabri)               |
| Ambulatory assistance required | 37 (42%) used a walking aid                       |
|                                | 28 (32%) unilateral assistance; i.e. single stick |
|                                | 6 (7%) bilateral assistance                       |
|                                | 3 (3%) wheelchair                                 |
| BMI (mean; range)              | 24.4 (15.5-46.1)                                  |
| BMI <20 (n;%)                  | 15 (17%)                                          |
| Current smoking (n;%)          | 28 (31.8%)                                        |
| History of falls (n;%)         | 48 (54.5%)                                        |
| Previous fragility fracture    | 0 (0%)                                            |
| Previous DXA imaging           | 6 (6.8%)                                          |

**Table 3:** 10 year fracture risks generated

|                                                            | FRAX<br>Any<br>fracture (10<br>year % risk) | QFracture<br>Any<br>fracture (10<br>year % risk) | MS-Specific<br>Any<br>osteoporotic<br>fracture (10<br>year % risk) | FRAX<br>Hip<br>fracture (10<br>year % risk) | QFracture<br>Hip fracture<br>(10 year %<br>risk) | MS-Specific<br>Hip<br>fracture (10<br>year % risk) |
|------------------------------------------------------------|---------------------------------------------|--------------------------------------------------|--------------------------------------------------------------------|---------------------------------------------|--------------------------------------------------|----------------------------------------------------|
| <b>Mean (SD)</b>                                           | 4.69 (3.20)                                 | 2.04 (2.14)                                      | 7.64 (5.05)                                                        | 0.66 (0.95)                                 | 0.23 (0.55)                                      | 3.39 (7.78)                                        |
| <b>Median</b>                                              | 3.45                                        | 1.20                                             | 6.00                                                               | 0.30                                        | 1.20                                             | 0                                                  |
| <b>Range</b>                                               | 2.3-19.0                                    | 0.4-13.0                                         | 2.0-25.0                                                           | 0.10-5.60                                   | 0-4.80                                           | 0-55.00                                            |
| <b>Patients<br/>meeting<br/>criteria for<br/>DXA (n;%)</b> | 27 (30.7%)                                  | 6 (6.8%)                                         | 65 (73.9%)                                                         |                                             |                                                  |                                                    |
| <b>Patients<br/>meeting</b>                                | 12 (13.6%)                                  | 3 (3.4%)                                         | 38 (43.2%)                                                         | 2 (2.3%)                                    | 1 (1.1%)                                         | 22 (25.0%)                                         |

1  
2  
3  
4  
5  
6  
7  
8  
9  
10  
11  
12  
13  
14  
15  
16  
17  
18  
19  
20  
21  
22  
23  
24  
25  
26  
27  
28  
29  
30  
31  
32  
33  
34  
35  
36  
37  
38  
39  
40  
41  
42  
43  
44  
45  
46  
47  
48  
49  
50  
51  
52  
53  
54  
55  
56  
57  
58  
59  
60

| criteria for treatment (n;%) |
|------------------------------|
|------------------------------|

For peer review only

## References

1. <http://guidance.nice.org.uk/CG/Wave25/2>. [01/11/2012].
2. Kanis JA, Johnell O, Oden A, Johansson H, McCloskey E. FRAX and the assessment of fracture probability in men and women from the UK. *Osteoporosis international : a journal established as result of cooperation between the European Foundation for Osteoporosis and the National Osteoporosis Foundation of the USA*. 2008;19(4):385-97. Epub 2008/02/23.
3. Hippisley-Cox J, Coupland C. Derivation and validation of updated QFracture algorithm to predict risk of osteoporotic fracture in primary care in the United Kingdom: prospective open cohort study. *BMJ*. 2012;344:e3427. Epub 2012/05/24.
4. Dobson R, Ramagopalan S, Giovannoni G. Bone health and multiple sclerosis. *Multiple Sclerosis*. 2012. Epub 2012/06/29.
5. Dennison EM, Compston JE, Flahive J, Siris ES, Gehlbach SH, Adachi JD, et al. Effect of co-morbidities on fracture risk: Findings from the Global Longitudinal Study of Osteoporosis in Women (GLOW). *Bone*. 2012. Epub 2012/03/20.
6. Bazelier MT, van Staa TP, Uitdehaag BM, Cooper C, Leufkens HG, Vestergaard P, et al. A simple score for estimating the long-term risk of fracture in patients with multiple sclerosis. *Neurology*. 2012. Epub 2012/08/17.
7. Weinschenker BG, Bass B, Rice GP, Noseworthy J, Carriere W, Baskerville J, et al. The natural history of multiple sclerosis: a geographically based study. I. Clinical course and disability. *Brain*. 1989;112 ( Pt 1):133-46. Epub 1989/02/01.
8. Borgstrom F, Johnell O, Kanis JA, Jonsson B, Rehnberg C. At what hip fracture risk is it cost-effective to treat? International intervention thresholds for the treatment of osteoporosis. *Osteoporos Int*. 2006;17(10):1459-71. Epub 2006/07/19.
9. Kanis JA, McCloskey EV, Johansson H, Strom O, Borgstrom F, Oden A. Case finding for the management of osteoporosis with FRAX--assessment and intervention thresholds for the UK. *Osteoporos Int*. 2008;19(10):1395-408. Epub 2008/08/30.
10. <http://www.shef.ac.uk/NOGG/index.html>. [cited 01/11/2012].
11. Bland JM, Altman DG. Statistical methods for assessing agreement between two methods of clinical measurement. *Lancet*. 1986;1(8476):307-10. Epub 1986/02/08.
12. Levin LI, Munger KL, Rubertone MV, Peck CA, Lennette ET, Spiegelman D, et al. Temporal relationship between elevation of epstein-barr virus antibody titers and initial onset of neurological symptoms in multiple sclerosis. *Jama*. 2005;293(20):2496-500.
13. Munger KL, Levin LI, Hollis BW, Howard NS, Ascherio A. Serum 25-hydroxyvitamin D levels and risk of multiple sclerosis. *Jama*. 2006;296(23):2832-8.
14. Murad MH, Drake MT, Mullan RJ, Mauck KF, Stuart LM, Lane MA, et al. Clinical review. Comparative effectiveness of drug treatments to prevent fragility fractures: a systematic review and network meta-analysis. *J Clin Endocrinol Metab*. 2012;97(6):1871-80. Epub 2012/04/03.
15. Johansen A. QFracture is better than FRAX tool in assessing risk of hip fracture. *BMJ*. 2012;345:e4988. Epub 2012/07/25.
16. Cummins NM, Poku EK, Towler MR, O'Driscoll OM, Ralston SH. clinical risk factors for osteoporosis in Ireland and the UK: a comparison of FRAX and QFractureScores. *Calcif Tissue Int*. 2011;89(2):172-7. Epub 2011/06/08.
17. Collins GS, Michaelsson K. Fracture risk assessment: state of the art, methodologically unsound, or poorly reported? *Curr Osteoporos Rep*. 2012;10(3):199-207. Epub 2012/06/13.
18. Khan NF, Harrison SE, Rose PW. Validity of diagnostic coding within the General Practice Research Database: a systematic review. *The British journal of general practice : the journal of the Royal College of General Practitioners*. 2010;60(572):e128-36. Epub 2010/03/06.
19. Wood B, van der Mei I, Ponsonby AL, Pittas F, Quinn S, Dwyer T, et al. Prevalence and concurrence of anxiety, depression and fatigue over time in multiple sclerosis. *Mult Scler*. 2012. Epub 2012/06/26.

1  
2  
3  
4  
5  
6  
7  
8  
9  
10  
11  
12  
13  
14  
15  
16  
17  
18  
19  
20  
21  
22  
23  
24  
25  
26  
27  
28  
29  
30  
31  
32  
33  
34  
35  
36  
37  
38  
39  
40  
41  
42  
43  
44  
45  
46  
47  
48  
49  
50  
51  
52  
53  
54  
55  
56  
57  
58  
59  
60

20. Weinstock-Guttman B, Hong J, Santos R, Tamano-Blanco M, Badgett D, Patrick K, et al. Interferon-beta modulates bone-associated cytokines and osteoclast precursor activity in multiple sclerosis patients. *Multiple Sclerosis*. 2006;12(5):541-50. Epub 2006/11/08.

21. Shuhaibar M, McKenna MJ, Au-Yeong M, Redmond JM. Favorable effect of immunomodulator therapy on bone mineral density in multiple sclerosis. *Ir J Med Sci*. 2009;178(1):43-5. Epub 2008/11/13.

For peer review only

1  
2  
3  
4  
5  
6  
7  
8  
9  
10  
11  
12  
13  
14  
15  
16  
17  
18  
19  
20  
21  
22  
23  
24  
25  
26  
27  
28  
29  
30  
31  
32  
33  
34  
35  
36  
37  
38  
39  
40  
41  
42  
43  
44  
45  
46  
47  
48  
49  
50  
51  
52  
53  
54  
55  
56  
57  
58  
59  
60

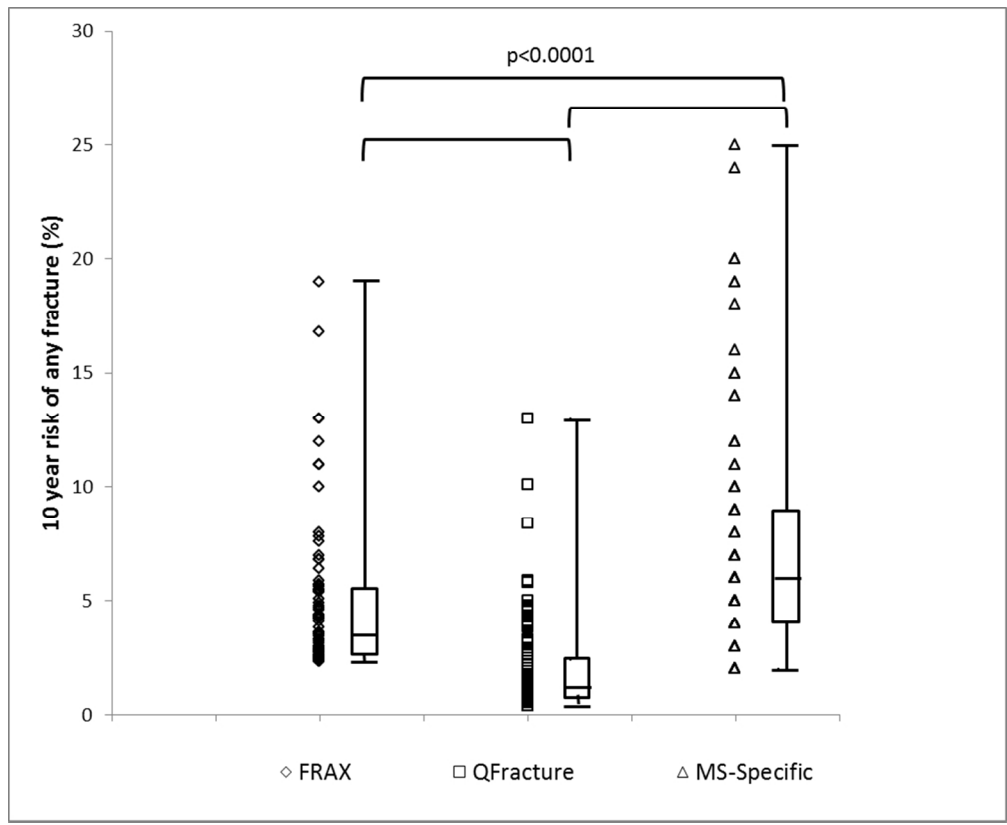

84x68mm (300 x 300 DPI)

Peer Review Only

1  
2  
3  
4  
5  
6  
7  
8  
9  
10  
11  
12  
13  
14  
15  
16  
17  
18  
19  
20  
21  
22  
23  
24  
25  
26  
27  
28  
29  
30  
31  
32  
33  
34  
35  
36  
37  
38  
39  
40  
41  
42  
43  
44  
45  
46  
47  
48  
49  
50  
51  
52  
53  
54  
55  
56  
57  
58  
59  
60

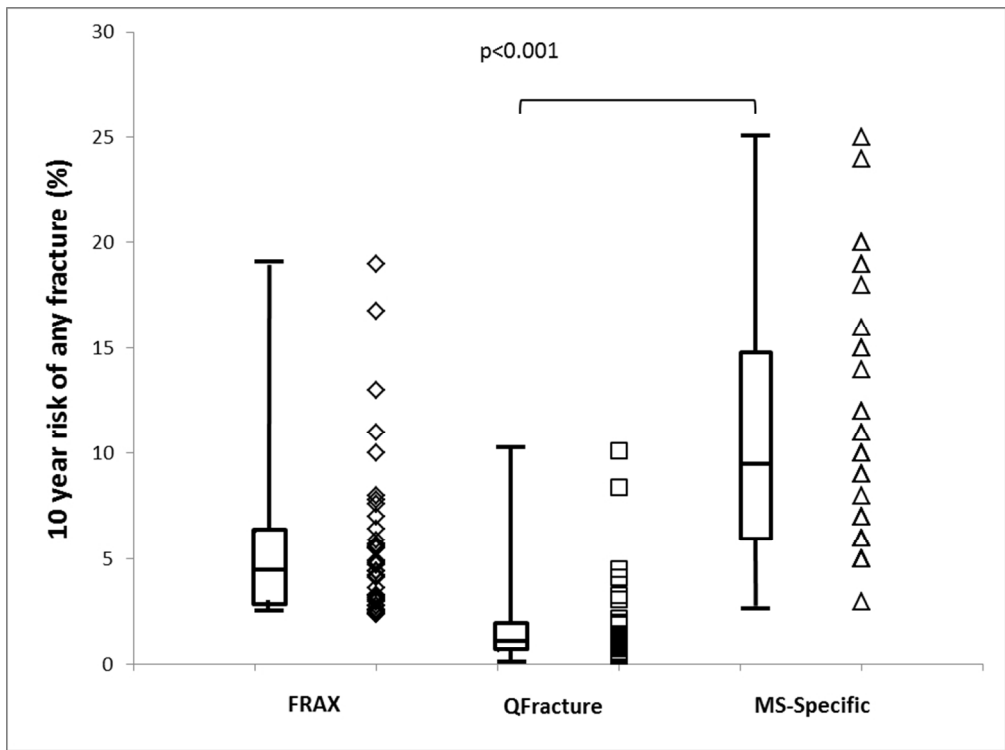

81x60mm (300 x 300 DPI)

Review only

1  
2  
3  
4  
5  
6  
7  
8  
9  
10  
11  
12  
13  
14  
15  
16  
17  
18  
19  
20  
21  
22  
23  
24  
25  
26  
27  
28  
29  
30  
31  
32  
33  
34  
35  
36  
37  
38  
39  
40  
41  
42  
43  
44  
45  
46  
47  
48  
49  
50  
51  
52  
53  
54  
55  
56  
57  
58  
59  
60

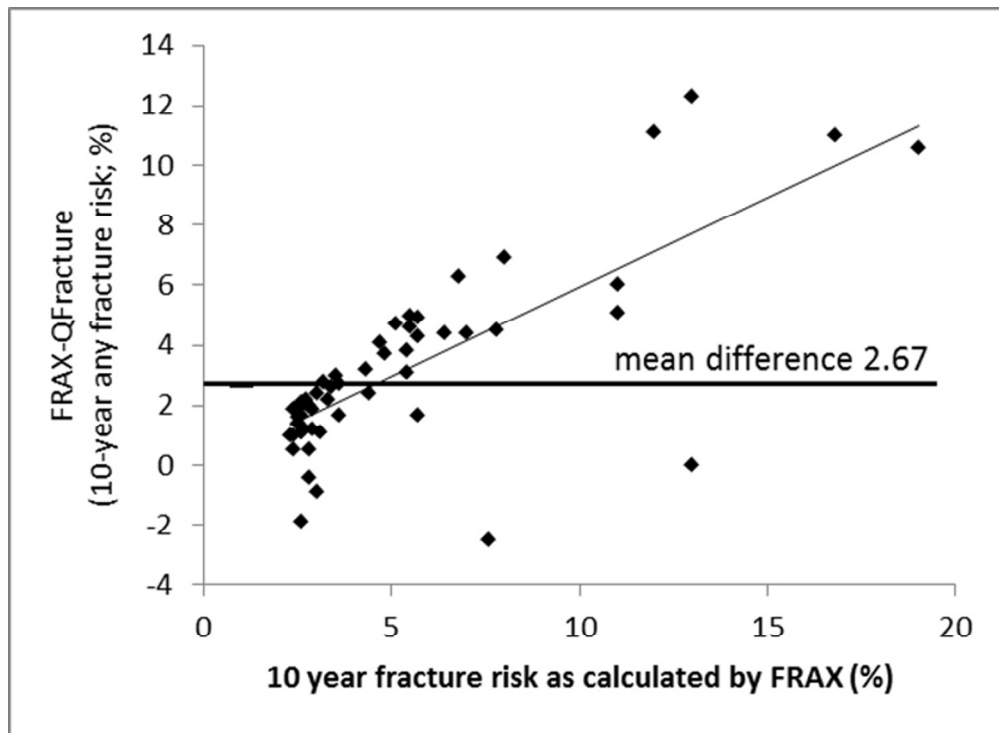

84x61mm (300 x 300 DPI)

Review only

1  
2  
3  
4  
5  
6  
7  
8  
9  
10  
11  
12  
13  
14  
15  
16  
17  
18  
19  
20  
21  
22  
23  
24  
25  
26  
27  
28  
29  
30  
31  
32  
33  
34  
35  
36  
37  
38  
39  
40  
41  
42  
43  
44  
45  
46  
47  
48  
49  
50  
51  
52  
53  
54  
55  
56  
57  
58  
59  
60

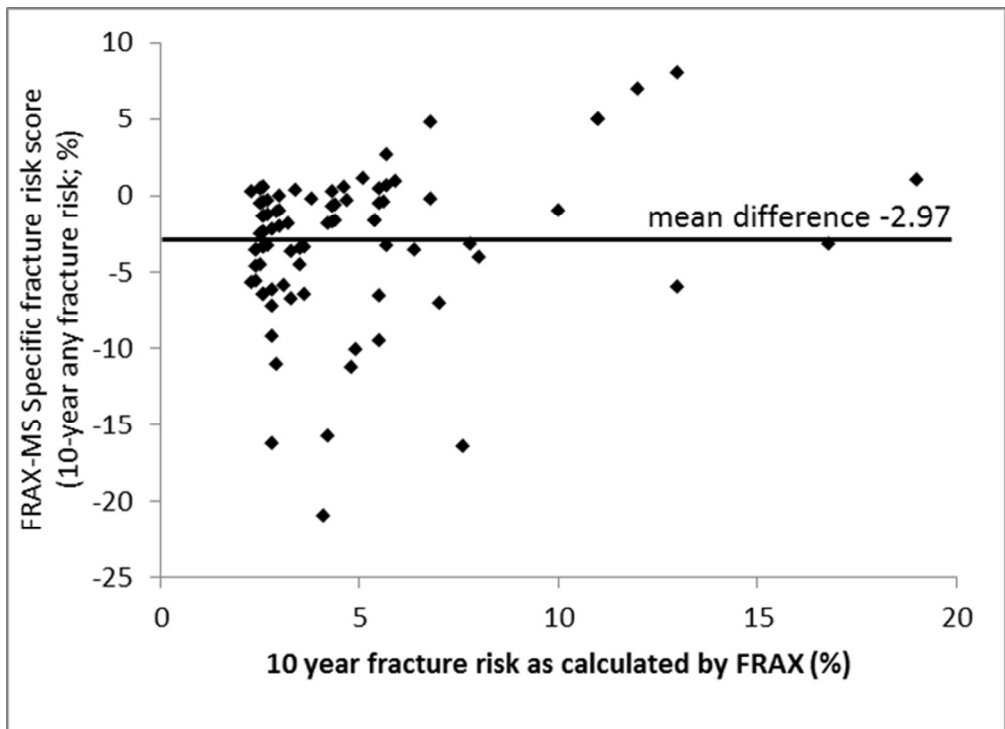

84x61mm (300 x 300 DPI)

View only



1  
2  
3  
4  
5  
6  
7  
8  
9  
10  
11  
12  
13  
14  
15  
16  
17  
18  
19  
20  
21  
22  
23  
24  
25  
26  
27  
28  
29  
30  
31  
32  
33  
34  
35  
36  
37  
38  
39  
40  
41  
42  
43  
44  
45  
46  
47  
48  
49  
50  
51  
52  
53  
54  
55  
56  
57  
58  
59  
60

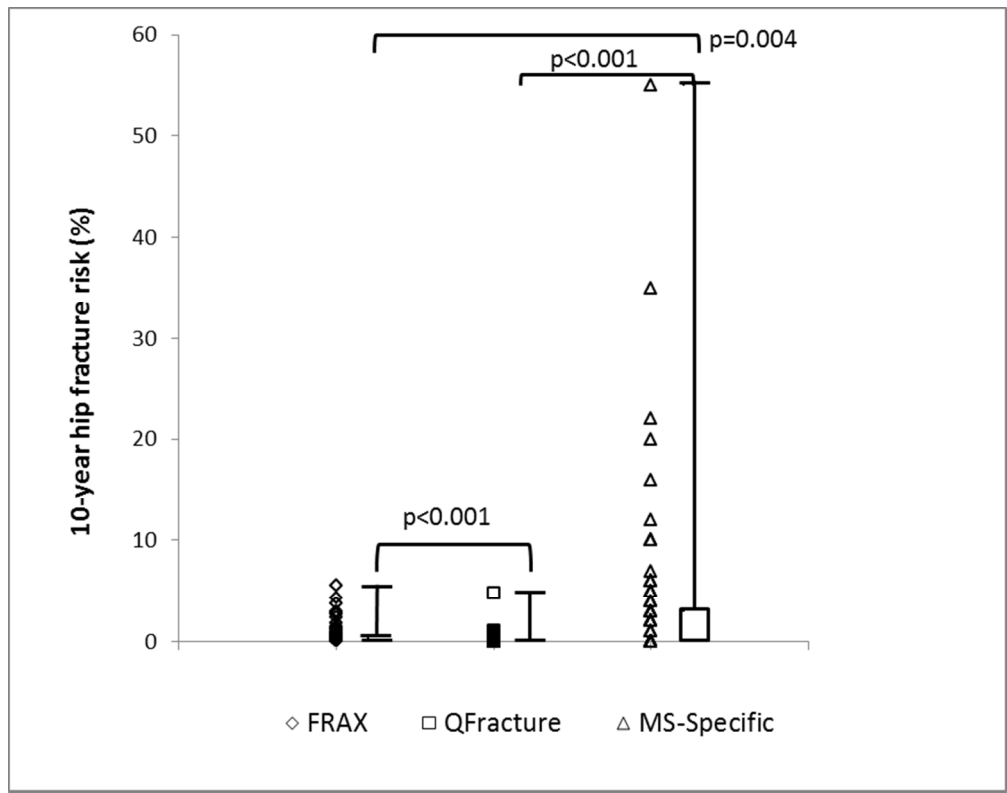

73x57mm (300 x 300 DPI)

ew only

1  
2  
3  
4  
5  
6  
7  
8  
9  
10  
11  
12  
13  
14  
15  
16  
17  
18  
19  
20  
21  
22  
23  
24  
25  
26  
27  
28  
29  
30  
31  
32  
33  
34  
35  
36  
37  
38  
39  
40  
41  
42  
43  
44  
45  
46  
47  
48  
49  
50  
51  
52  
53  
54  
55  
56  
57  
58  
59  
60

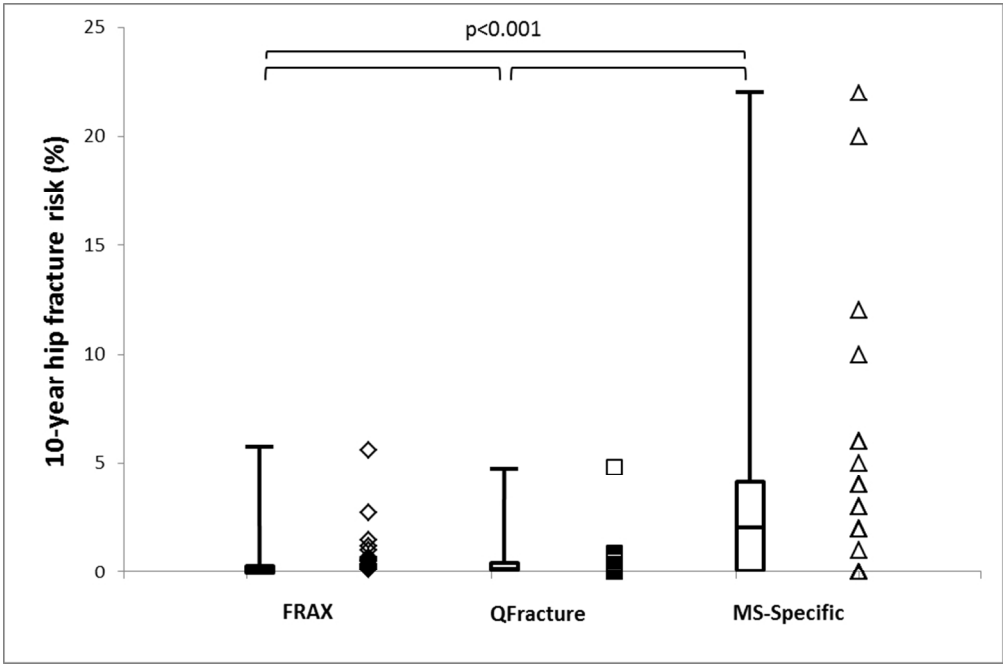

84x56mm (300 x 300 DPI)

Review only

Dobson et al: Assessing fracture risk in MS

1  
2  
3 **Assessing fracture risk in people with MS: a service development study comparing three fracture**  
4 **risk scoring systems**  
5

6 R Dobson MA MRCP, SG Leddy BA, S Gangadharan, G Giovannoni PhD, FRCP  
7

8 R Dobson: Clinical Research Fellow and Honorary SpR Neurology  
9

10 SG Leddy and S Gangadharan: Medical Students  
11

12 G Giovannoni: Professor of Neurology  
13

14 Address for all authors: Blizard Institute, Queen Mary University of London, Barts and the London  
15

16 School of Medicine and Dentistry, London, UK  
17  
18  
19  
20  
21

22 Corresponding author: Dr Ruth Dobson; Blizard Institute, 4 Newark Street, London, E1 2AT.  
23

24 Telephone 0207 882 2282 email [ruth.dobson@qmul.ac.uk](mailto:ruth.dobson@qmul.ac.uk)  
25  
26

27 Guarantor: Professor G Giovannoni; Blizard Institute, 4 Newark Street, London, E1 2AT. Email  
28

29 [g.giovannoni@qmul.ac.uk](mailto:g.giovannoni@qmul.ac.uk)  
30  
31  
32  
33  
34

35 **Research Article**

36 **Keywords:** Multiple Sclerosis, osteoporosis, fracture.  
37

38 **Abstract:** 245 words  
39

40 **Paper:** 2788 words  
41

42 **21 references**  
43

44 **3 figures and 3 tables**  
45

46 **Running head:** Assessing fracture risk in MS  
47  
48  
49  
50  
51  
52  
53  
54  
55  
56  
57  
58  
59  
60

**Abstract**

**Objectives:** Suboptimal bone health is increasingly recognised as an important cause of morbidity. Multiple sclerosis (MS) has been consistently associated with an increased risk of osteoporosis and fracture. Various fracture risk screening tools have been developed, two of which are in routine use, and a further one is MS-specific. We set out to compare the results obtained by these in the MS clinic population.

**Design:** This was a service development study. The 10-year risk estimates of any fracture and hip fracture generated by each of the algorithms were compared.

**Setting and participants:** 88 patients with a confirmed diagnosis of MS who were attending the MS clinic at the Royal London Hospital were assessed.

**Outcome measures:** Mean 10-year overall fracture risk and hip fracture risk were calculated using each of the three fracture risk calculators. The number of interventions that would be required as a result of using each of these tools were also compared.

**Results:** Mean 10-year fracture risk was 4.7%, 2.3% and 7.6% using FRAX, QFracture and the MS-specific calculator respectively ( $p < 0.0001$  for difference). The agreement between risk scoring tools was poor at all levels of fracture risk.

**Conclusions:** The agreement between these three fracture risk scoring tools is poor in the MS population. Further work is required to develop and validate an accurate fracture risk scoring system for use in MS.

**Trial registration:** This service development study was approved by the Clinical Effectiveness Department at Barts Health NHS Trust (project registration number 156/12).

## Article summary

### Article focus:

- Recent National Institute of Clinical Excellence (NICE) guidelines in the UK recommend assessing bone health using one of two validated scoring systems, FRAX and QFracture in those at risk of fragility fracture. However, these fracture risk scoring systems do not take into account all risks associated with fragility fractures.
- Multiple sclerosis (MS) has been associated with an increased hazard ratio of hip fracture, and was one of the two neurological conditions significantly associated with an increased risk of fracture in the Global Longitudinal study of Osteoporosis in Women (GLOW) study.
- This study therefore set out to compare existing fracture risk scoring algorithms in a multiple sclerosis clinic, in order to assess both the effect of using each of the algorithms on further investigations and treatment, and to assess whether the algorithms provide similar results in this clinic population.

### Key messages:

- The agreement between fracture risk calculators is poor, with QFracture consistently giving lower risk estimates than FRAX.
- Whilst reducing fracture risk should be a priority to all clinicians dealing with chronic conditions associated with an increased risk of fracture, there must be consistency in the way in which fracture risk is calculated. A prospective study is urgently required in order that we can determine the best way to predict and prevent fractures.

### Strengths and limitations:

- To the best of our knowledge, this is the first study to directly compare fracture risk scoring tools in the MS clinic population, assessing the rate of interventions that would be indicated by using each tool

1  
2  
3  
4  
5  
6  
7  
8  
9  
10  
11  
12  
13  
14  
15  
16  
17  
18  
19  
20  
21  
22  
23  
24  
25  
26  
27  
28  
29  
30  
31  
32  
33  
34  
35  
36  
37  
38  
39  
40  
41  
42  
43  
44  
45  
46  
47  
48  
49  
50  
51  
52  
53  
54  
55  
56  
57  
58  
59  
60

• This study is of relatively small sample size, however it provides important pilot data to support further work in this area.

• The lack of longitudinal follow up does not allow us to fully assess the relative accuracy of each tool. Further longitudinal prospective studies are required.

For peer review only

## Introduction

Suboptimal bone health is increasingly recognised as an important cause of morbidity. Recent National Institute of Clinical Excellence (NICE) guidelines in the UK (1) recommend assessing bone health using one of two validated scoring systems, FRAX and QFracture, in those at risk of fragility fracture (2, 3). These scores, both of which have been generated from and validated against large databases, allow the calculation of an individual's 10-year fracture risk, both in terms of any fracture and hip fracture. NICE guidelines currently recommend the calculation of fracture risk before proceeding to DXA imaging (1).

However, these fracture risk scoring systems do not take into account all risks associated with fragility fractures. Multiple sclerosis (MS) has been associated with a hazard ratio of hip fracture of 1.9 – 4.08 (4), and was one of the two neurological conditions significantly associated with an increased risk of fracture in the Global Longitudinal study of Osteoporosis in Women (GLOW) study (HR of any fracture in MS 1.7; 95%CI 1.2-2.6) (5). There have been recent efforts to develop a fracture risk calculator that takes into account the increased risk of fracture and osteoporosis associated with MS (6). However, this calculator has been developed from a single database, the UK General Practice Database, and has not been validated to date.

There are common factors associated with an increased risk of developing MS and an increased fracture risk, such as vitamin D deficiency and smoking. It therefore seems likely that the increased fracture risk associated with MS develops early in the disease (4). Indeed, it has been shown that the lowered bone mineral density associated with MS develops whilst patients remain fully mobile (4).

This leads to problems using fracture risk assessment tools, as the FRAX algorithm has the lower age limit set at 40 years, whilst in the QFracture algorithm the lowest age is 30. The mean age of MS diagnosis is approximately 29 (7), implying that many patients are first seen at a relatively young age.

1  
2  
3 It has been argued that the 10-year fracture risk at which intervention becomes cost-effective varies  
4  
5 according to the country in which the societal cost is modelled (8). For a 50-year-old individual, the  
6  
7 10-year fracture risk at which it becomes cost-effective to intervene may be as low as 0.84% in the  
8  
9 UK (a relative risk of osteoporotic fracture of 1.83 compared to the general population, similar to  
10  
11 that associated with MS; in the USA treatment at a relative risk of 1.31 is thought to be cost-  
12  
13 effective) (8). This highlights the importance of fracture risk screening in the MS clinic population.  
14

15  
16 Given the importance of fracture risk screening in the MS population and the uncertainty regarding  
17  
18 which risk calculator to use we set out to compare the three fracture risk calculator systems in the  
19  
20 MS outpatient clinic population. This study enables direct comparison of the fracture risk estimates  
21  
22 generated by these three studies in addition to examining the number of interventions that the use  
23  
24 of each of these calculators would result in.  
25  
26

## 27 28 **Methods**

### 29 30 *Patient selection and data collection*

31  
32 This service development study was approved by the Clinical Effectiveness Department at Barts  
33  
34 Health NHS Trust (project registration number 156/12). 100 patients with clinically definite MS  
35  
36 attending either the MS outpatient clinic or the Neurology Daycase Unit were assessed. Sufficient  
37  
38 data to enable fracture risk scoring was available on 88 patients (see **table 1** for details of data  
39  
40 required for each fracture risk calculator). The use of an assistive device for walking together with  
41  
42 details regarding MS duration and treatment, previous DXA imaging, previous fragility or other  
43  
44 fracture, and medications used for the treatment of reduced bone mineral density were also  
45  
46 recorded.  
47  
48  
49  
50

### 51 52 *Fracture risk scoring*

53  
54  
55 10 year risk of both “any fracture” and “hip fracture” were assessed using the FRAX scoring  
56  
57 algorithm (2), the QFracture algorithm (3) and the recently proposed MS-specific fracture risk score  
58  
59  
60



1  
2  
3 algorithm (6). As the FRAX score algorithm only allows a minimum age of 40 years, patients aged <40  
4  
5 were assigned an age of 40 for the purposes of this calculation. The QFracture algorithm allows a  
6  
7 minimum age of 30, and so patients aged <30 were assigned an age of 30. The MS-specific fracture  
8  
9 risk calculator does not have a lower age cut-off. A result of this was that patients aged <40 were  
10  
11 assigned different ages in at least two of the risk calculations. A subgroup analysis was performed  
12  
13 including only those patients aged 40 or over, in order to assess whether the inclusion of patients  
14  
15 younger than the cut-off age had affected the results.  
16  
17  
18

19 In order to assess the number of patients who would require DXA imaging and/or treatment, an  
20  
21 imaging threshold of a 10-year fracture risk for any fracture of >5% was assigned. The treatment  
22  
23 threshold was taken to be a 10-year fracture risk of >7% for any fracture, and >4% for hip fracture.  
24  
25 The UK National Osteoporosis Guideline Group (NOGG) has estimated that in the UK pharmacologic  
26  
27 treatment is cost effective at all ages when the 10-year probability of major osteoporotic fracture  
28  
29 exceeds 7% (9). In practice, the UK NOGG recommends an age-dependent intervention threshold,  
30  
31 which ranges from 1 10-year fracture risk of 7.5 – 30% for ages 50 to 80 years (10). However, these  
32  
33 figures are, if anything, somewhat conservative as discussed above.  
34  
35  
36

### 37 *Statistical analysis*

38  
39 Statistical analysis was performed using PASW v18.0 (SPSS). Risk score distributions were assessed  
40  
41 for normality using a Shapiro-Wilk test, and attempts made to normalise the data using a natural log  
42  
43 transformation. As it proved impossible to normalise the data, non-parametric statistical tests were  
44  
45 used. The absolute risk scores generated by each fracture risk score were directly compared using  
46  
47 the Friedman test. Scores were then compared between pairs of risk scoring systems using the  
48  
49 Wilcoxon signed rank test.  
50  
51  
52

53  
54 The agreement between individual scores was assessed using a Bland-Altman plot (11). This method  
55  
56 allows a visual description of both the agreement between scores, in addition to demonstrating any  
57  
58  
59  
60

1  
2  
3 systematic or significant proportional errors between the two sets of results (11). A further analysis  
4 was performed by putting the scores obtained into rank order, and separating them into rank order  
5 quintiles, an accepted technique used in the MS literature (12, 13). The agreement between  
6 quintiles was then compared using the kappa coefficient. Finally, the proportion of individuals  
7  
8  
9  
10 meeting the pre-set criteria for DXA imaging and potential treatment intervention was compared  
11  
12  
13 using Fishers exact test.  
14

## 15 16 17 Results

### 18 19 Subjects

20  
21  
22 Of 100 patients recruited, 88 gave sufficient information to allow their 10-year fracture risk to be  
23 accurately calculated using the three algorithms. Demographic details of these patients are given in  
24 **table 2.** Mean disease duration was 7.96 years (range 0-30); 76/88 patients were receiving disease  
25 modifying treatment (see table 2 for more information). 42/100 patients used a walking aid; of  
26  
27  
28  
29  
30  
31  
32  
33  
34  
35  
36  
37  
38  
39  
40  
41  
42  
43  
44  
45  
46  
47  
48  
49  
50  
51  
52  
53  
54  
55  
56  
57  
58  
59  
60  
whom 8 required bilateral assistance and 4 used a wheelchair to mobilise. Of the four patients using  
a wheelchair to mobilise, two were ambulatory with bilateral assistance for short distances, and two  
were essentially confined to the wheelchair, requiring assistance to transfer. Of the 88 patients who  
had their fracture risk calculated, 37 (42%) used a walking aid; of these 6 (7%) required bilateral  
assistance, 2 (2%) used a wheelchair for longer distances only and 1 (1%) was essentially wheelchair  
bound. 49/100 patients reported falling in the preceding 6 months; of the 88 with full fracture risk  
data 48 (54.5%) reported a history of falls. 22 (52%) patients using a walking aid reported falls in the  
preceding 6 months compared to 28% of those who did not require a walking aid. No patients had a  
history of a prior fracture meeting the definition of a fragility fracture (14).

### Fracture risk

- a. 10 year risk of any fracture

1  
2  
3 Mean 10-year fracture risk was 4.7% assessed by FRAX (standard deviation; SD 3.20, range 2.3-19.0),  
4  
5 2.3% assessed by QFracture (SD 2.14, range 0.4-13.0) and 7.6% using the MS-specific calculator (SD  
6  
7 5.05, range 2.0-25.0) (**table 3**). Despite efforts it was not possible to normalise the distribution for  
8  
9 any of the fracture risk scores. There was an overall significant difference between the scores  
10  
11 generated by the three algorithms ( $p < 0.001$ ; Friedman test), which was preserved on pairwise  
12  
13 testing ( $p < 0.001$  for all comparisons, Wilcoxon signed rank test) (**table 3 and figure 1a**).

14  
15  
16 Bland-Altman plots revealed reasonable agreement between FRAX and QFracture at lower fracture  
17  
18 risk scores, but for those patients with higher fracture risk a systematic error was apparent with  
19  
20 QFracture consistently giving lower risk estimates than FRAX (mean difference 2.68) (**figure 2a**).  
21  
22 When FRAX and the MS-specific risk score were compared the agreement was poor, with FRAX  
23  
24 consistently lower than the MS-specific score (mean difference 2.97) (**figure 2b**). The same could be  
25  
26 seen when QFracture and the MS-specific risk score were compared (mean difference 5.60; data not  
27  
28 shown).  
29  
30

31  
32  
33 Given that 50 of the patients were younger than 40, the minimum age used in the FRAX calculation,  
34  
35 the results obtained for the 38 patients aged 40 or over were compared in a sub-group analysis. This  
36  
37 revealed similar results to those obtained when all patients were included (**figure 1b**). The highly  
38  
39 significant difference in the results obtained by all three fracture risk scores remained ( $p < 0.001$  for  
40  
41 all comparisons, Wilcoxon signed rank test).

42  
43  
44 Kappa coefficient was calculated for the agreement between rank quintiles for pairs of fracture risk  
45  
46 scores. All comparisons generated a low kappa value, indicative of poor agreement between rank  
47  
48 quintile assignment (FRAX vs. QFracture: kappa 0.065, 95%CI -0.05-0.181, weighted kappa 0.133;  
49  
50 FRAX vs. MS-specific score: kappa 0.084, 95%CI -0.029-0.197, weighted kappa 0.225, QFracture vs.  
51  
52 MS-specific score: kappa 0.114 95%CI -0.006-0.235, weighted kappa 0.057).

1  
2  
3 The number of patients who met the pre-determined criteria for DXA imaging and treatment are  
4  
5 given in **table 3**. There was a significant difference between all three groups for both DXA imaging  
6  
7 (p<0.0001 for all comparisons) and treatment (p=0.03 when comparing FRAX and QFracture,  
8  
9 otherwise p<0.0001). Of the six patients who had previously undergone DXA imaging, 3 met the  
10  
11 criteria for imaging using either the FRAX or MS-specific risk score. None met the fracture risk cut-off  
12  
13 for imaging using the QFracture algorithm. Of the six patients who had undergone DXA imaging, four  
14  
15 were on no **treatment**; one patient was taking calcium supplementation and one HRT. None of the  
16  
17 patients had been diagnosed with osteoporosis.  
18  
19

20  
21 *b. 10 year risk of hip fracture*  
22

23  
24 Mean 10-year hip fracture risk was 0.7% assessed by FRAX (standard deviation; SD 0.95, range 0.1-  
25  
26 5.6), 0.2% assessed by QFracture (SD 0.55, range 0.0-4.8) and 3.4% using the MS-specific calculator  
27  
28 (SD 7.78, range 0.0-55.0) (**table 3**). Again, it was not possible to normalise the distribution for any of  
29  
30 the fracture risk scores. There was an overall significant difference between the scores generated by  
31  
32 the three algorithms (p<0.001; Friedman test), which was preserved on pairwise testing (p=0.004 for  
33  
34 comparison of FRAX and MS-specific risk calculator, p<0.001 for other comparisons, Wilcoxon signed  
35  
36 rank test) (**table 3 and figure 3a**). Again, when only those aged 40 or over were analysed separately,  
37  
38 the significant difference between the 10 year fracture risk generated by the fracture risk calculators  
39  
40 differed significantly (figure 3b). Agreement between rank quintiles was poor (FRAX vs. QFracture:  
41  
42 kappa 0.022, 95%CI -0.108-0.152, weighted kappa 0.033; FRAX vs. MS-specific score: kappa 0.016,  
43  
44 95%CI -0.096-0.129, weighted kappa 0.107, QFracture vs. MS-specific score: kappa 0.165 95%CI  
45  
46 0.035-0.295, weighted kappa 0.235).  
47  
48

49  
50 The comparison of scores generated similar Bland-Altman plots to those seen when examining the  
51  
52 data for overall fracture risk (data not shown). There was no **significant** difference between FRAX  
53  
54 and QFracture in the number of patients who met the predetermined treatment threshold, however  
55  
56  
57  
58  
59  
60

1  
2  
3 both differed significantly from the MS-specific fracture risk calculator ( $p < 0.0001$  for both  
4  
5 comparisons).

## 8 Discussion

11 From the results presented above it can be seen that the agreement between the three fracture risk  
12 calculators is poor in this population, both in absolute terms and when examining rank quintiles.  
13 There have been previous attempts to compare the results obtained by FRAX and QFracture (15)  
14 (16), and these have highlighted similar issues (17). When the authors of the MS-specific score  
15 compared the scores generated by their model to those generated by the FRAX algorithm, they  
16 found that FRAX appeared to significantly underestimate fracture risk for patients with MS,  
17 especially with regard to hip fracture (6).

27 One failure of the FRAX algorithm is that it does not allow the calculation of accurate risk for those  
28 aged  $< 40$ ; as the majority of our patients were aged between 20 and 40, this could represent a  
29 source of error. However, the findings did not differ significantly when only those patients aged 40  
30 or over were included. A significant limitation of this study was the relatively small sample size  
31 (n=88), which was further reduced in the subgroup analysis of those patients aged 40 or over (n=38).  
32 This must be borne in mind when interpreting the results; however, the magnitude of the  
33 differences cannot be ignored.

43 The FRAX algorithm has previously been criticised for not incorporating factors such as falls (15);  
44 whilst this is a significant omission, it would be expected that this would lead to an underestimation  
45 of risk when using this calculator. However, the QFracture algorithm, which does incorporate falls  
46 into the calculation, gave consistently lower fracture risk scores than the FRAX calculator. This may  
47 be due to a more accurate estimate of age-specific risk, as the QFracture allows the imputation of  
48 age from age 30. However, despite including Parkinson's disease as a factor, the QFracture calculator  
49 does not include MS.

1  
2  
3 The MS-specific calculator appeared to consistently over-estimate fracture risk. Whilst one might  
4  
5 imagine that this would be the most accurate of the risk calculators, the number of patients judged  
6  
7 to be over either the investigation or treatment threshold was far higher than expected. This risk  
8  
9 calculator was generated from the UK General Practice database. It incorporates a number of factors  
10  
11 into the risk calculator that are not captured by other risk calculators, such as recent steroid use (as  
12  
13 a surrogate for relapses) and fatigue (hip fracture risk calculation only). However, it has previously  
14  
15 been shown that coding is of variable accuracy in [the GP](#) database (18). As most short courses of  
16  
17 intravenous steroid are given in secondary care, it is not inconceivable that these would not be  
18  
19 captured accurately. Additionally, whilst more than half of patients with MS report fatigue when  
20  
21 directly questioned (19), it is likely that only those with the very highest levels of fatigue have this  
22  
23 recorded by their General Practitioners.  
24  
25

26  
27 The lack of agreement between the fracture risk calculation tools is likely to be, at least in part, a  
28  
29 result of the ways in which they have been developed. FRAX was developed using fracture incidence  
30  
31 rates in the UK general population, whilst the other two calculators have been generated from the  
32  
33 UK General Practice database. Differences in fracture reporting and recording, together with  
34  
35 differences in the recording of fracture risk factors between these databases are likely to contribute  
36  
37 to the differences between the results generated in the population studied. This study highlights the  
38  
39 fact that the results generated from one fracture risk scoring tool cannot be substituted for those  
40  
41 generated by another, and consistent use of a single tool within a population is required to stratify  
42  
43 risk in that population. Similarly, the thresholds for further investigation or treatment are likely to  
44  
45 vary between the risk scoring tools. The NOGG guidance (9) has been developed with reference to  
46  
47 the FRAX tool, and so should be used in conjunction with this.  
48  
49

50  
51  
52 To date, there are no papers examining primary prevention of osteoporosis or osteoporotic fractures  
53  
54 in MS. There is also a need to assess the effect of MS disease modifying treatments on fracture risk.  
55  
56 Whether MS disease modifying treatments have any effect on BMD outside of a general beneficial  
57  
58  
59  
60

effect on bone health through the maintenance of weight-bearing mobility remains controversial. Theoretically interferon-beta preparations should protect against bone mineral loss in MS through induction of the tumour necrosis factor related apoptosis-inducing ligand (TRAIL) (20). There is a single paper demonstrating that people with MS treated with interferon-beta had z-scores significantly greater than zero (21), but there was no control group in this study, meaning that it is impossible to draw any firm conclusions regarding this.

There remains much work to be done with regard to assessing fracture risk in the MS population, who are at high risk of fracture and associated complications. Whilst reducing fracture risk should be a priority to all clinicians dealing with chronic conditions associated with an increased risk of fracture, there must be consistency in the way in which fracture risk is calculated. A prospective study in the MS population, encompassing both fracture risk calculation and bone densitometry estimation using DXA is urgently needed in order that we can determine the best way to assess the risk of, and act to prevent fractures.

### Contributorship

RD and GG conceived the idea of this study. RD, SGL and SG performed fracture risk scoring. RD performed the statistical analysis and initially drafted the paper. All authors provided input into the final manuscript.

The Corresponding Author has the right to grant on behalf of all authors and does grant on behalf of all authors, an exclusive licence (or non exclusive for government employees) on a worldwide basis to the BMJ Publishing Group Ltd to permit this article (if accepted) to be published in BMJ editions and any other BMJ PGL products and sublicences such use and exploit all subsidiary rights, as set out in our licence."

### Ethical approval

This service development study was approved by the Clinical Effectiveness Department at Barts Health NHS Trust (project registration number 156/12).

### Conflicts of interest

RD, SGL and SG have no conflicts of interest to declare.

GG has received research grant support from Bayer-Schering Healthcare, Biogen-Idec, GW Pharma, Merck Serono, Merz, Novartis, Teva and Sanofi-Aventis. GG has received personal compensation for participating on Advisory Boards in relation to clinical trial design, trial steering committees and data and safety monitoring committees from: Bayer-Schering Healthcare, Biogen-Idec, Eisai, Elan, Fiveprime, Genzyme, Genentech, GSK, Ironwood, Merck-Serono, Novartis, Pfizer, Roche, Sanofi-Aventis, Synthon BV, Teva, UCB Pharma and Vertex Pharmaceuticals.

### Funding

RD is funded by an Association of British Neurologists/MS Society of Great Britain Clinical Research Fellowship.



Dobson et al: Assessing fracture risk in MS

GG receives grant support from the MRC, National MS Society, MS Society of Great Britain and Northern Ireland, AIMS2CURE and the Roan Charitable Trust.

For peer review only

**Figure legends**

**Table 1:** Data used in the calculation of fracture risk for each of the three risk scoring algorithms used

**Table 2:** Patient details

**Table 3:** 10 year any fracture risks generated by each of the three fracture risk scoring algorithms

**Figure 1:** (a) Combined scatter and box-and-whisker plot demonstrating 10-year any fracture risk generated by each of the three risk scoring algorithms. The box represents the 25<sup>th</sup>-75<sup>th</sup> centile bisected by the median, with the whiskers the range. (b) 10-year any fracture risks generated by each of the three risk scoring algorithms for those patients aged 40 or over only. The box represents the 25<sup>th</sup>-75<sup>th</sup> centile bisected by the median, with the whiskers the range.

**Figure 2:** (a) Bland-Altman plot comparing FRAX and QFracture scores for 10-year risk of any fracture. (b) Bland-Altman plot comparing FRAX and MS-specific scores for 10-year risk of any fracture

**Figure 3:** (a) 10-year hip fracture risks generated by each of the three risk scoring algorithms for all patients. The box represents the 25<sup>th</sup>-75<sup>th</sup> centile bisected by the median, with the whiskers the range. (b) 10-year hip fracture risks generated by each of the three risk scoring algorithms for those patients aged 40 or over only. The box represents the 25<sup>th</sup>-75<sup>th</sup> centile bisected by the median, with the whiskers the range.

**Table 1:** Data used in the calculation of fracture risk for each of the three risk scoring algorithms

| FRAX                            | QFracture                                                | MS-specific calculator                                                |
|---------------------------------|----------------------------------------------------------|-----------------------------------------------------------------------|
| Age                             | Age                                                      | Age                                                                   |
| Sex                             | Sex                                                      | Sex                                                                   |
| Weight; height; BMI             | Weight; height; BMI                                      | BMI                                                                   |
| Previous fracture               | Previous fragility fracture                              | Previous fracture (any fracture only)                                 |
| Parental hip fracture           | Parental osteoporosis or hip fracture                    |                                                                       |
| Current smoking                 | Current or previous smoking, number of cigarettes smoked | Current smoking                                                       |
| Glucocorticoid exposure         | Regular glucocorticoid exposure                          | Use of PO/IV glucocorticoids in the prior 6 months                    |
| Rheumatoid arthritis            | Rheumatoid arthritis or SLE                              |                                                                       |
| Secondary osteoporosis          |                                                          |                                                                       |
| Alcohol >3 units/day            | Alcohol number of units/day                              |                                                                       |
| Femoral neck DXA (if available) |                                                          |                                                                       |
|                                 | Ethnicity                                                |                                                                       |
|                                 | Diabetes                                                 |                                                                       |
|                                 | Nursing/care home residence                              |                                                                       |
|                                 | Falls                                                    | History of falling 3 months – 1 year before                           |
|                                 | Dementia                                                 |                                                                       |
|                                 | Cancer                                                   |                                                                       |
|                                 | Asthma/COPD                                              |                                                                       |
|                                 | Heart attack, angina, stroke, TIA                        |                                                                       |
|                                 | Chronic liver disease                                    |                                                                       |
|                                 | Chronic kidney disease                                   |                                                                       |
|                                 | Parkinson's disease                                      |                                                                       |
|                                 | Malabsorption including Crohn's disease                  |                                                                       |
|                                 | Endocrine problems including thyroid dysfunction         |                                                                       |
|                                 | Epilepsy/anticonvulsant exposure                         | Use of anticonvulsants in the prior 6 months (any fracture risk only) |
|                                 | Antidepressants                                          | Use of antidepressants in the prior 6 months                          |
|                                 | Oestrogen-only HRT                                       |                                                                       |
|                                 |                                                          | History of fatigue in the prior 6 months (hip fracture only)          |

**BMI:** body mass index

**Glucocorticoid exposure:** defined as currently exposure to oral glucocorticoids or previous exposure to oral glucocorticoids for more than 3 months at a dose of prednisolone of 5mg daily or more (or equivalent doses of other glucocorticoids).

**Secondary osteoporosis:** defined as a disorder strongly associated with osteoporosis. These include type I (insulin dependent) diabetes, osteogenesis imperfecta in adults, untreated long-standing hyperthyroidism, hypogonadism or premature menopause (<45 years), chronic malnutrition, or malabsorption and chronic liver disease.

**PO:** oral

**IV:** intravenous

**Table 2:** Patient details

| Characteristic                        | Patients (n=88)                                          |
|---------------------------------------|----------------------------------------------------------|
| Age (mean; range)                     | 37.5 years (22-56)                                       |
| Female (n;%)                          | 55 (62.5%)                                               |
| <u>Disease duration (mean; range)</u> | <u>7.96 years (0-30)</u>                                 |
| <u>Disease modifying therapy</u>      | <u>76/88 (86.4%) receiving disease modifying therapy</u> |
|                                       | <u>5/88 (5.7%) glatiramer acetate (Copaxone)</u>         |
|                                       | <u>15/88 (17.0%) interferon beta preparations</u>        |
|                                       | <u>56/88 (63.6%) natalizumab (Tysabri)</u>               |
| <u>Ambulatory assistance required</u> | <u>37 (42%) used a walking aid</u>                       |
|                                       | <u>28 (32%) unilateral assistance; i.e. single stick</u> |
|                                       | <u>6 (7%) bilateral assistance</u>                       |
|                                       | <u>3 (3%) wheelchair</u>                                 |
| BMI (mean; range)                     | 24.4 (15.5-46.1)                                         |
| BMI <20 (n;%)                         | 15 (17%)                                                 |
| Current smoking (n;%)                 | 28 (31.8%)                                               |
| History of falls (n;%)                | <u>48 (54.5%)</u>                                        |
| Previous fragility fracture           | 0 (0%)                                                   |
| Previous DXA imaging                  | 6 (6.8%)                                                 |

**Table 3:** 10 year fracture risks generated

|                                                            | FRAX<br>Any<br>fracture (10<br>year % risk) | QFracture<br>Any<br>fracture (10<br>year % risk) | MS-Specific<br>Any<br>osteoporotic<br>fracture (10<br>year % risk) | FRAX<br>Hip<br>fracture (10<br>year % risk) | QFracture<br>Hip fracture<br>(10 year %<br>risk) | MS-Specific<br>Hip<br>fracture (10<br>year % risk) |
|------------------------------------------------------------|---------------------------------------------|--------------------------------------------------|--------------------------------------------------------------------|---------------------------------------------|--------------------------------------------------|----------------------------------------------------|
| <b>Mean (SD)</b>                                           | 4.69 (3.20)                                 | 2.04 (2.14)                                      | 7.64 (5.05)                                                        | 0.66 (0.95)                                 | 0.23 (0.55)                                      | 3.39 (7.78)                                        |
| <b>Median</b>                                              | 3.45                                        | 1.20                                             | 6.00                                                               | 0.30                                        | 1.20                                             | 0                                                  |
| <b>Range</b>                                               | 2.3-19.0                                    | 0.4-13.0                                         | 2.0-25.0                                                           | 0.10-5.60                                   | 0-4.80                                           | 0-55.00                                            |
| <b>Patients<br/>meeting<br/>criteria for<br/>DXA (n;%)</b> | 27 (30.7%)                                  | 6 (6.8%)                                         | 65 (73.9%)                                                         |                                             |                                                  |                                                    |
| <b>Patients<br/>meeting</b>                                | 12 (13.6%)                                  | 3 (3.4%)                                         | 38 (43.2%)                                                         | 2 (2.3%)                                    | 1 (1.1%)                                         | 22 (25.0%)                                         |

criteria for  
treatment  
(n;%)

For peer review only

1  
2  
3  
4  
5  
6  
7  
8  
9  
10  
11  
12  
13  
14  
15  
16  
17  
18  
19  
20  
21  
22  
23  
24  
25  
26  
27  
28  
29  
30  
31  
32  
33  
34  
35  
36  
37  
38  
39  
40  
41  
42  
43  
44  
45  
46  
47  
48  
49  
50  
51  
52  
53  
54  
55  
56  
57  
58  
59  
60

## References

1. <http://guidance.nice.org.uk/CG/Wave25/2>. [01/11/2012].
2. Kanis JA, Johnell O, Oden A, Johansson H, McCloskey E. FRAX and the assessment of fracture probability in men and women from the UK. *Osteoporosis international : a journal established as result of cooperation between the European Foundation for Osteoporosis and the National Osteoporosis Foundation of the USA*. 2008;19(4):385-97. Epub 2008/02/23.
3. Hippisley-Cox J, Coupland C. Derivation and validation of updated QFracture algorithm to predict risk of osteoporotic fracture in primary care in the United Kingdom: prospective open cohort study. *BMJ*. 2012;344:e3427. Epub 2012/05/24.
4. Dobson R, Ramagopalan S, Giovannoni G. Bone health and multiple sclerosis. *Multiple Sclerosis*. 2012. Epub 2012/06/29.
5. Dennison EM, Compston JE, Flahive J, Siris ES, Gehlbach SH, Adachi JD, et al. Effect of co-morbidities on fracture risk: Findings from the Global Longitudinal Study of Osteoporosis in Women (GLOW). *Bone*. 2012. Epub 2012/03/20.
6. Bazelier MT, van Staa TP, Uitdehaag BM, Cooper C, Leufkens HG, Vestergaard P, et al. A simple score for estimating the long-term risk of fracture in patients with multiple sclerosis. *Neurology*. 2012. Epub 2012/08/17.
7. Weinschenker BG, Bass B, Rice GP, Noseworthy J, Carriere W, Baskerville J, et al. The natural history of multiple sclerosis: a geographically based study. I. Clinical course and disability. *Brain*. 1989;112 ( Pt 1):133-46. Epub 1989/02/01.
8. Borgstrom F, Johnell O, Kanis JA, Jonsson B, Rehnberg C. At what hip fracture risk is it cost-effective to treat? International intervention thresholds for the treatment of osteoporosis. *Osteoporos Int*. 2006;17(10):1459-71. Epub 2006/07/19.
9. Kanis JA, McCloskey EV, Johansson H, Strom O, Borgstrom F, Oden A. Case finding for the management of osteoporosis with FRAX--assessment and intervention thresholds for the UK. *Osteoporos Int*. 2008;19(10):1395-408. Epub 2008/08/30.
10. <http://www.shef.ac.uk/NOGG/index.html>. [cited 01/11/2012].
11. Bland JM, Altman DG. Statistical methods for assessing agreement between two methods of clinical measurement. *Lancet*. 1986;1(8476):307-10. Epub 1986/02/08.
12. Levin LI, Munger KL, Rubertone MV, Peck CA, Lennette ET, Spiegelman D, et al. Temporal relationship between elevation of epstein-barr virus antibody titers and initial onset of neurological symptoms in multiple sclerosis. *Jama*. 2005;293(20):2496-500.
13. Munger KL, Levin LI, Hollis BW, Howard NS, Ascherio A. Serum 25-hydroxyvitamin D levels and risk of multiple sclerosis. *Jama*. 2006;296(23):2832-8.
14. Murad MH, Drake MT, Mullan RJ, Mauck KF, Stuart LM, Lane MA, et al. Clinical review. Comparative effectiveness of drug treatments to prevent fragility fractures: a systematic review and network meta-analysis. *J Clin Endocrinol Metab*. 2012;97(6):1871-80. Epub 2012/04/03.
15. Johansen A. QFracture is better than FRAX tool in assessing risk of hip fracture. *BMJ*. 2012;345:e4988. Epub 2012/07/25.
16. Cummins NM, Poku EK, Towler MR, O'Driscoll OM, Ralston SH. clinical risk factors for osteoporosis in Ireland and the UK: a comparison of FRAX and QFractureScores. *Calcif Tissue Int*. 2011;89(2):172-7. Epub 2011/06/08.
17. Collins GS, Michaelsson K. Fracture risk assessment: state of the art, methodologically unsound, or poorly reported? *Curr Osteoporos Rep*. 2012;10(3):199-207. Epub 2012/06/13.
18. Khan NF, Harrison SE, Rose PW. Validity of diagnostic coding within the General Practice Research Database: a systematic review. *The British journal of general practice : the journal of the Royal College of General Practitioners*. 2010;60(572):e128-36. Epub 2010/03/06.
19. Wood B, van der Mei I, Ponsonby AL, Pittas F, Quinn S, Dwyer T, et al. Prevalence and concurrence of anxiety, depression and fatigue over time in multiple sclerosis. *Mult Scler*. 2012. Epub 2012/06/26.

- 1  
2  
3 20. Weinstock-Guttman B, Hong J, Santos R, Tamano-Blanco M, Badgett D, Patrick K, et al.  
4 Interferon-beta modulates bone-associated cytokines and osteoclast precursor activity in multiple  
5 sclerosis patients. *Multiple Sclerosis*. 2006;12(5):541-50. Epub 2006/11/08.  
6  
7 21. Shuhaibar M, McKenna MJ, Au-Yeong M, Redmond JM. Favorable effect of  
8 immunomodulator therapy on bone mineral density in multiple sclerosis. *Ir J Med Sci*.  
9 2009;178(1):43-5. Epub 2008/11/13.

10  
11  
12  
13  
14  
15  
16  
17  
18  
19  
20  
21  
22  
23  
24  
25  
26  
27  
28  
29  
30  
31  
32  
33  
34  
35  
36  
37  
38  
39  
40  
41  
42  
43  
44  
45  
46  
47  
48  
49  
50  
51  
52  
53  
54  
55  
56  
57  
58  
59  
60

For peer review only
